# Supplementary material for: Enhancement of fluorescence and photostability of luminescent radicals by quadruple addition of phenyl groups
Source: Royal Society of Chemistry journal article supplement (doi:10.1039/d2tc03132a), 2022-01-01

## Supplementary Information

# Enhancement of fluorescence and photostability of luminescent radicals by quadruple addition of phenyl groups

Sara Mattiello <sup>\*a</sup> Yohei Hattori <sup>\*b</sup> Ryota Kitajima <sup>b</sup> Ryota Matsuoka <sup>c,d</sup> Tetsuro, Kusamoto <sup>c,d,e</sup> Kingo Uchida <sup>b</sup> and Luca Beverina <sup>a</sup>

<sup>a</sup>Department of Materials Science, University of Milano-Bicocca,  
Via R. Cozzi 55, 20126 Milano, Italy.

<sup>b</sup>Materials Chemistry Course, Faculty of Advanced Science and Technology, Ryukoku University,  
Seta, Otsu, Shiga 520-2194, Japan.

<sup>c</sup>Department of Life and Coordination-Complex Molecular Science, Institute for Molecular Science,  
5-1 Higashiyama, Myodaiji, Okazaki, Aichi 444-8787, Japan.

<sup>d</sup>SOKENDAI (The Graduate University for Advanced Studies),  
Shonan Village, Hayama, Kanagawa 240-0193, Japan.

<sup>e</sup>JST-PRESTO,  
4-1-8, Honcho, Kawaguchi, Saitama 332-0012, Japan.

## Contents

|                                                                                               |    |
|-----------------------------------------------------------------------------------------------|----|
| Table S1. Torsion angles in the ground state optimized using UB3LYP/6-31G(d)                  | 2  |
| Table S2. Experimental and TD-DFT calculated absorption data using UB3LYP/6-31G(d)            | 2  |
| Table S3. Torsion angles in the D <sub>1</sub> excited state optimized using UM06-2X/6-31G(d) | 2  |
| Table S4. Torsion angles in the D <sub>1</sub> excited state optimized using UB3LYP/6-31G(d)  | 2  |
| Table S5. Emission properties                                                                 | 3  |
| Table S6. TD-DFT calculated emission wavelengths.                                             | 3  |
| Table S7. Stability under 370 nm UV irradiation.                                              | 3  |
| Cartesian coordinates of all the optimized geometries by DFT calculation                      | 4  |
| Results of TD-DFT calculations                                                                | 15 |
| NMR spectra                                                                                   | 28 |

**Table S1.** Torsion angles of the aryl rings of the radicals in the ground state optimized using UB3LYP/6-31G(d).

|             | F <sub>2</sub> PyBTM | <i>m</i> Ph <sub>2</sub> -F <sub>2</sub> PyBTM | 1   | 2   | 3   |
|-------------|----------------------|------------------------------------------------|-----|-----|-----|
| $\varphi_1$ | 31°                  | 32°                                            | 32° | 31° | 32° |
| $\varphi_2$ | 53°                  | 53°                                            | 52° | 52° | 52° |
| $\varphi_3$ | 53°                  | 53°                                            | 52° | 52° | 53° |
| $\phi_4$    | -                    | 86°                                            | 67° | 65° | 65° |
| $\phi_5$    | -                    | 86°                                            | 67° | 65° | 80° |
| $\phi_6$    | -                    | -                                              | 50° | 48° | 48° |
| $\phi_7$    | -                    | -                                              | 50° | 48° | -   |

$\varphi_1$ : Torsion angle of pyridyl ring.  $\varphi_2$  and  $\varphi_3$ : Torsion angles of dirchlorophenyl rings.  $\phi_4$  and  $\phi_5$ : Dihedral angles between *m*-phenyl groups and dichlorophenyl groups.  $\phi_6$  and  $\phi_7$ : Dihedral angles between *p*-phenyl groups and dichlorophenyl groups.

**Table S2.** Experimental and TD-DFT calculated absorption data using UB3LYP/6-31G(d).

|   | Observed absorption maxima in cyclohexane                                                                                                     | Calculated largest transition   | Calculated second largest transition |
|---|-----------------------------------------------------------------------------------------------------------------------------------------------|---------------------------------|--------------------------------------|
| 1 | 382 nm ( $\epsilon = 1.6 \times 10^4 \text{ M}^{-1}\text{cm}^{-1}$ ),<br>362 nm ( $\epsilon = 1.6 \times 10^4 \text{ M}^{-1}\text{cm}^{-1}$ ) | 398 nm ( $D_8, f = 0.0940$ )    | 382 nm ( $D_{11}, f = 0.0808$ )      |
| 2 | 364 nm ( $\epsilon = 1.1 \times 10^4 \text{ M}^{-1}\text{cm}^{-1}$ )                                                                          | 385 nm ( $D_{11}, f = 0.1131$ ) | 368 nm ( $D_{15}, f = 0.0715$ )      |
| 3 | 358 nm ( $\epsilon = 1.5 \times 10^4 \text{ M}^{-1}\text{cm}^{-1}$ )                                                                          | 363 nm ( $D_{15}, f = 0.0985$ ) | 386 nm ( $D_{10}, f = 0.0804$ )      |

**Table S3.** Torsion angles of the aryl rings of the radicals in the D<sub>1</sub> excited state optimized using UM06-2X/6-31G(d).

|             | F <sub>2</sub> PyBTM | <i>m</i> Ph <sub>2</sub> -F <sub>2</sub> PyBTM | 1   | 2   | 3   |
|-------------|----------------------|------------------------------------------------|-----|-----|-----|
| $\varphi_1$ | 13°                  | 24°                                            | 25° | 25° | 24° |
| $\varphi_2$ | 55°                  | 44°                                            | 42° | 42° | 42° |
| $\varphi_3$ | 55°                  | 47°                                            | 47° | 48° | 49° |
| $\phi_4$    | -                    | 65°                                            | 63° | 51° | 50° |
| $\phi_5$    | -                    | 77°                                            | 66° | 65° | 71° |
| $\phi_6$    | -                    | -                                              | 38° | 36° | 36° |
| $\phi_7$    | -                    | -                                              | 49° | 48° | -   |

**Table S4.** Torsion angles of of the aryl rings of the radicals in the D<sub>1</sub> excited state optimized using UB3LYP/6-31G(d).

|             | F <sub>2</sub> PyBTM | <i>m</i> Ph <sub>2</sub> -F <sub>2</sub> PyBTM | 1   | 2   | 3   |
|-------------|----------------------|------------------------------------------------|-----|-----|-----|
| $\varphi_1$ | 20°                  | 24°                                            | 24° | 24° | 23° |
| $\varphi_2$ | 52°                  | 47°                                            | 50° | 51° | 51° |
| $\varphi_3$ | 52°                  | 52°                                            | 49° | 50° | 50° |
| $\phi_4$    | -                    | 50°                                            | 47° | 47° | 48° |
| $\phi_5$    | -                    | 86°                                            | 67° | 66° | 90° |
| $\phi_6$    | -                    | -                                              | 48° | 48° | 49° |
| $\phi_7$    | -                    | -                                              | 49° | 48° | -   |

**Table S5.** TD-DFT calculated emission wavelength

|          | UB3LYP/6-31G(d)//<br>UB3LYP/6-31G(d) | UM06-2X/6-31G(d)//<br>UM06-2X/6-31G(d) | UBMK/6-31G(d)//<br>UM06-2X/6-31G(d) | UPBE0/6-31G(d)//<br>UM06-2X/6-31G(d) |
|----------|--------------------------------------|----------------------------------------|-------------------------------------|--------------------------------------|
| <b>1</b> | 669 nm ( $f=0.0318$ )                | 584 nm ( $f=0.0680$ )                  | 592 nm ( $f=0.0718$ )               | 628 nm ( $f=0.0612$ )                |
| <b>2</b> | 790 nm ( $f=0.0375$ )                | 615 nm ( $f=0.1053$ )                  | 635 nm ( $f=0.1130$ )               | 695 nm ( $f=0.0991$ )                |
| <b>3</b> | 829 nm ( $f=0.0323$ )                | 625 nm ( $f=0.0997$ )                  | 649 nm ( $f=0.1020$ )               | 715 nm ( $f=0.0850$ )                |

**Table S6.** Emission properties.

|          | Solvent         | $\Phi_f / \%$ | $\tau / \text{ns}$ | $k_f / 10^7 \text{ s}^{-1}$ | $k_{nr} / 10^7 \text{ s}^{-1}$ |
|----------|-----------------|---------------|--------------------|-----------------------------|--------------------------------|
| <b>1</b> | Cyclohexane     | 6             | 9                  | 0.7                         | 10                             |
| <b>2</b> | Cyclohexane     | 17            | 13                 | 1.3                         | 6.4                            |
| <b>3</b> | Cyclohexane     | 15            | 13                 | 1.2                         | 6.5                            |
| <b>1</b> | Toluene         | 9             | 11                 | 0.8                         | 8.3                            |
| <b>2</b> | Toluene         | 19            | 12                 | 1.6                         | 6.7                            |
| <b>3</b> | Toluene         | 11            | 9                  | 1.2                         | 10                             |
| <b>1</b> | Chloroform      | 13            | 14                 | 0.9                         | 6.2                            |
| <b>2</b> | Chloroform      | 2             | 1.9                | 1.1                         | 52                             |
| <b>3</b> | Chloroform      | 1             | 1.2                | 0.8                         | 82                             |
| <b>1</b> | Dichloromethane | 11            | 15                 | 0.7                         | 6.0                            |
| <b>2</b> | Dichloromethane | 0.3           | 0.8                | 0.4                         | $1.3 \times 10^2$              |
| <b>3</b> | Dichloromethane | 0.3           | 0.6                | 0.5                         | $1.7 \times 10^2$              |
| <b>1</b> | Acetone         | 11            | 13                 | 0.8                         | 6.9                            |
| <b>2</b> | Acetone         | 0             |                    |                             |                                |
| <b>3</b> | Acetone         | 0             |                    |                             |                                |

**Table S7.** Stability of **1**, **2**, **3**, and PyBTM in dichloromethane or cyclohexane under 370 nm UV irradiation.

| Exp. no. | $t_{1/2}$ [s]            | $t_{1/2}$ [s]               | $t_{1/2}$ [s]        | $t_{1/2}$ [s]           | $t_{1/2}$ [s]           |
|----------|--------------------------|-----------------------------|----------------------|-------------------------|-------------------------|
|          | PyBTM in dichloromethane | <b>1</b> in dichloromethane | PyBTM in cyclohexane | <b>2</b> in cyclohexane | <b>3</b> in cyclohexane |
| 1        | 234                      | 3084                        | 238                  | 1594                    | 2550                    |
| 2        | 342                      | 3064                        | 198                  | 1510                    | 1998                    |
| 3        | 234                      | 2794                        | 184                  | 1642                    | 2276                    |
| 4        | 318                      |                             | 178                  |                         |                         |
| 5        | 292                      |                             | 234                  |                         |                         |
| Ave      | 284                      | 2981                        | 206                  | 1582                    | 2275                    |
| $\sigma$ | 49                       | 162                         | 28                   | 67                      | 276                     |

## Cartesian coordinates of the optimized geometries by DFT calculation

Ph<sub>4</sub>-F<sub>2</sub>PyBTM (1, Ground state, UB3LYP/6-31G(d))

Standard orientation:

| Center<br>Number | Atomic<br>Number | Atomic<br>Type | Coordinates (Angstroms) |           |           |
|------------------|------------------|----------------|-------------------------|-----------|-----------|
|                  |                  |                | X                       | Y         | Z         |
| 1                | 17               | 0              | 1.701912                | 2.494084  | -2.533769 |
| 2                | 17               | 0              | -0.809142               | -0.200674 | -2.174564 |
| 3                | 17               | 0              | 0.809142                | -0.200664 | 2.174559  |
| 4                | 17               | 0              | -1.701913               | 2.494107  | 2.533748  |
| 5                | 7                | 0              | 0.000025                | 6.121606  | 0.000007  |
| 6                | 6                | 0              | 3.312643                | 0.635074  | -1.480428 |
| 7                | 1                | 0              | 3.912333                | 0.850231  | -2.357189 |
| 8                | 6                | 0              | 1.719752                | 0.062198  | 0.692401  |
| 9                | 6                | 0              | -2.129079               | 1.329344  | 1.288406  |
| 10               | 6                | 0              | 1.049454                | 5.426187  | 0.451854  |
| 11               | 1                | 0              | 1.905583                | 5.979728  | 0.829227  |
| 12               | 6                | 0              | 0.000010                | 3.255382  | -0.000002 |
| 13               | 6                | 0              | -3.312647               | 0.635099  | 1.480413  |
| 14               | 6                | 0              | -3.717890               | -0.374339 | 0.599291  |
| 15               | 6                | 0              | 2.129078                | 1.329324  | -1.288424 |
| 16               | 6                | 0              | 1.080285                | 4.039292  | 0.462209  |
| 17               | 6                | 0              | -1.719753               | 0.062200  | -0.692408 |
| 18               | 6                | 0              | -2.905730               | -0.673416 | -0.519718 |
| 19               | 6                | 0              | 2.905726                | -0.673424 | 0.519714  |
| 20               | 6                | 0              | -1.269516               | 1.068499  | 0.198198  |
| 21               | 6                | 0              | 1.269516                | 1.068490  | -0.198213 |
| 22               | 6                | 0              | -1.080256               | 4.039307  | -0.462208 |
| 23               | 6                | 0              | -1.049410               | 5.426201  | -0.451844 |
| 24               | 6                | 0              | 0.000002                | 1.802861  | -0.000008 |
| 25               | 1                | 0              | -1.905534               | 5.979753  | -0.829213 |
| 26               | 9                | 0              | -2.174540               | 3.433669  | -0.956386 |
| 27               | 9                | 0              | 2.174562                | 3.433641  | 0.956385  |
| 28               | 6                | 0              | 3.717886                | -0.374359 | -0.599300 |
| 29               | 6                | 0              | 3.330175                | -1.696872 | 1.525245  |
| 30               | 6                | 0              | 2.625302                | -2.900790 | 1.668821  |
| 31               | 6                | 0              | 4.451351                | -1.469833 | 2.334535  |
| 32               | 6                | 0              | 3.036100                | -3.857649 | 2.596043  |
| 33               | 1                | 0              | 1.751611                | -3.084832 | 1.049454  |
| 34               | 6                | 0              | 4.858579                | -2.424227 | 3.266897  |
| 35               | 1                | 0              | 5.004563                | -0.540767 | 2.231770  |
| 36               | 6                | 0              | 4.153889                | -3.621427 | 3.398917  |
| 37               | 1                | 0              | 2.481272                | -4.787143 | 2.692672  |
| 38               | 1                | 0              | 5.728042                | -2.231040 | 3.889446  |
| 39               | 1                | 0              | 4.472693                | -4.365896 | 4.123502  |
| 40               | 1                | 0              | -3.912339               | 0.850263  | 2.357171  |
| 41               | 6                | 0              | -3.330182               | -1.696878 | -1.525233 |
| 42               | 6                | 0              | -2.625291               | -2.900785 | -1.668816 |
| 43               | 6                | 0              | -4.451384               | -1.469869 | -2.334495 |
| 44               | 6                | 0              | -3.036095               | -3.857659 | -2.596019 |
| 45               | 1                | 0              | -1.751583               | -3.084807 | -1.049467 |
| 46               | 6                | 0              | -4.858617               | -2.424277 | -3.266840 |
| 47               | 1                | 0              | -5.004612               | -0.540813 | -2.231724 |
| 48               | 6                | 0              | -4.153907               | -3.621465 | -3.398869 |
| 49               | 1                | 0              | -2.481252               | -4.787144 | -2.692654 |
| 50               | 1                | 0              | -5.728100               | -2.231111 | -3.889368 |
| 51               | 1                | 0              | -4.472714               | -4.365945 | -4.123440 |
| 52               | 6                | 0              | -4.996940               | -1.079454 | 0.901837  |
| 53               | 6                | 0              | -5.070903               | -2.478920 | 0.987593  |
| 54               | 6                | 0              | -6.153912               | -0.330031 | 1.171393  |
| 55               | 6                | 0              | -6.266871               | -3.107215 | 1.329827  |
| 56               | 1                | 0              | -4.185954               | -3.075712 | 0.793938  |
| 57               | 6                | 0              | -7.352421               | -0.960007 | 1.506187  |
| 58               | 1                | 0              | -6.114984               | 0.753760  | 1.100160  |
| 59               | 6                | 0              | -7.412575               | -2.351640 | 1.587764  |
| 60               | 1                | 0              | -6.302216               | -4.191191 | 1.398030  |
| 61               | 1                | 0              | -8.238541               | -0.361894 | 1.701190  |
| 62               | 1                | 0              | -8.344694               | -2.844395 | 1.850665  |
| 63               | 6                | 0              | 4.996933                | -1.079478 | -0.901847 |
| 64               | 6                | 0              | 5.070914                | -2.478948 | -0.987533 |
| 65               | 6                | 0              | 6.153889                | -0.330055 | -1.171474 |

|    |   |   |          |           |           |
|----|---|---|----------|-----------|-----------|
| 66 | 6 | 0 | 6.266880 | -3.107244 | -1.329769 |
| 67 | 1 | 0 | 4.185979 | -3.075742 | -0.793824 |
| 68 | 6 | 0 | 7.352397 | -0.960033 | -1.506270 |
| 69 | 1 | 0 | 6.114952 | 0.753739  | -1.100293 |
| 70 | 6 | 0 | 7.412567 | -2.351669 | -1.587778 |
| 71 | 1 | 0 | 6.302236 | -4.191224 | -1.397919 |
| 72 | 1 | 0 | 8.238504 | -0.361918 | -1.701329 |
| 73 | 1 | 0 | 8.344684 | -2.844425 | -1.850681 |

(MeOPh)<sub>4</sub>-F<sub>2</sub>PyBTM (2, Ground state, UB3LYP/6-31G(d))

Standard orientation:

| Center<br>Number | Atomic<br>Number | Atomic<br>Type | Coordinates (Angstroms) |           |           |
|------------------|------------------|----------------|-------------------------|-----------|-----------|
|                  |                  |                | X                       | Y         | Z         |
| 1                | 17               | 0              | 1.651978                | 3.037434  | -2.566699 |
| 2                | 17               | 0              | -0.853793               | 0.336801  | -2.155169 |
| 3                | 17               | 0              | 0.853794                | 0.336819  | 2.155170  |
| 4                | 17               | 0              | -1.651986               | 3.037453  | 2.566678  |
| 5                | 7                | 0              | 0.000008                | 6.661197  | -0.000017 |
| 6                | 6                | 0              | 3.279296                | 1.171832  | -1.550917 |
| 7                | 1                | 0              | 3.856256                | 1.384245  | -2.443363 |
| 8                | 6                | 0              | 1.733104                | 0.597859  | 0.653015  |
| 9                | 6                | 0              | -2.103145               | 1.869434  | 1.331127  |
| 10               | 6                | 0              | 1.057571                | 5.965024  | 0.431536  |
| 11               | 1                | 0              | 1.921016                | 6.518149  | 0.792650  |
| 12               | 6                | 0              | 0.000002                | 3.793665  | -0.000009 |
| 13               | 6                | 0              | -3.279302               | 1.171846  | 1.550906  |
| 14               | 6                | 0              | -3.703600               | 0.158794  | 0.681544  |
| 15               | 6                | 0              | 2.103140                | 1.869423  | -1.331141 |
| 16               | 6                | 0              | 1.088533                | 4.578157  | 0.441411  |
| 17               | 6                | 0              | -1.733105               | 0.597853  | -0.653017 |
| 18               | 6                | 0              | -2.914409               | -0.139928 | -0.455997 |
| 19               | 6                | 0              | 2.914408                | -0.139924 | 0.455999  |
| 20               | 6                | 0              | -1.264562               | 1.607202  | 0.225116  |
| 21               | 6                | 0              | 1.264560                | 1.607199  | -0.225126 |
| 22               | 6                | 0              | -1.088527               | 4.578159  | -0.441432 |
| 23               | 6                | 0              | -1.057558               | 5.965027  | -0.431566 |
| 24               | 6                | 0              | -0.000001               | 2.341008  | -0.000006 |
| 25               | 1                | 0              | -1.921001               | 6.518154  | -0.792683 |
| 26               | 9                | 0              | -2.192531               | 3.973472  | -0.915196 |
| 27               | 9                | 0              | 2.192535                | 3.973468  | 0.915178  |
| 28               | 6                | 0              | 3.703595                | 0.158787  | -0.681547 |
| 29               | 6                | 0              | 3.356492                | -1.163880 | 1.450518  |
| 30               | 6                | 0              | 2.641067                | -2.360105 | 1.633151  |
| 31               | 6                | 0              | 4.506389                | -0.962786 | 2.218937  |
| 32               | 6                | 0              | 3.065013                | -3.318252 | 2.542801  |
| 33               | 1                | 0              | 1.741386                | -2.539356 | 1.050953  |
| 34               | 6                | 0              | 4.942164                | -1.913353 | 3.144879  |
| 35               | 1                | 0              | 5.077207                | -0.046873 | 2.096189  |
| 36               | 6                | 0              | 4.220569                | -3.100734 | 3.308494  |
| 37               | 1                | 0              | 2.516656                | -4.244664 | 2.682091  |
| 38               | 1                | 0              | 5.836879                | -1.717207 | 3.724433  |
| 39               | 1                | 0              | -3.856264               | 1.384267  | 2.443348  |
| 40               | 6                | 0              | -3.356490               | -1.163894 | -1.450508 |
| 41               | 6                | 0              | -2.641065               | -2.360122 | -1.633122 |
| 42               | 6                | 0              | -4.506382               | -0.962807 | -2.218935 |
| 43               | 6                | 0              | -3.065008               | -3.318280 | -2.542763 |
| 44               | 1                | 0              | -1.741388               | -2.539368 | -1.050917 |
| 45               | 6                | 0              | -4.942153               | -1.913384 | -3.144869 |
| 46               | 1                | 0              | -5.077200               | -0.046892 | -2.096201 |
| 47               | 6                | 0              | -4.220559               | -3.100768 | -3.308465 |
| 48               | 1                | 0              | -2.516652               | -4.244694 | -2.682040 |
| 49               | 1                | 0              | -5.836865               | -1.717244 | -3.724430 |
| 50               | 6                | 0              | -4.971900               | -0.547107 | 1.014316  |
| 51               | 6                | 0              | -5.063247               | -1.951470 | 1.062310  |
| 52               | 6                | 0              | -6.112401               | 0.190182  | 1.358434  |
| 53               | 6                | 0              | -6.239902               | -2.581984 | 1.436262  |
| 54               | 1                | 0              | -4.197269               | -2.555091 | 0.813399  |
| 55               | 6                | 0              | -7.307806               | -0.430390 | 1.727983  |
| 56               | 1                | 0              | -6.076675               | 1.275768  | 1.320311  |

|    |   |   |            |           |           |
|----|---|---|------------|-----------|-----------|
| 57 | 6 | 0 | -7.375147  | -1.827024 | 1.769924  |
| 58 | 1 | 0 | -6.305482  | -3.664507 | 1.482411  |
| 59 | 1 | 0 | -8.168507  | 0.180664  | 1.974537  |
| 60 | 6 | 0 | 4.971894   | -0.547117 | -1.014317 |
| 61 | 6 | 0 | 5.063241   | -1.951480 | -1.062298 |
| 62 | 6 | 0 | 6.112395   | 0.190169  | -1.358447 |
| 63 | 6 | 0 | 6.239894   | -2.581999 | -1.436248 |
| 64 | 1 | 0 | 4.197264   | -2.555099 | -0.813377 |
| 65 | 6 | 0 | 7.307797   | -0.430407 | -1.727994 |
| 66 | 1 | 0 | 6.076669   | 1.275755  | -1.320334 |
| 67 | 6 | 0 | 7.375139   | -1.827042 | -1.769921 |
| 68 | 1 | 0 | 6.305475   | -3.664522 | -1.482386 |
| 69 | 1 | 0 | 8.168498   | 0.180644  | -1.974557 |
| 70 | 8 | 0 | -8.482381  | -2.543212 | 2.117657  |
| 71 | 8 | 0 | -4.552947  | -4.100437 | -4.175626 |
| 72 | 8 | 0 | 4.552961   | -4.100393 | 4.175664  |
| 73 | 8 | 0 | 8.482371   | -2.543233 | -2.117651 |
| 74 | 6 | 0 | 9.656651   | -1.832668 | -2.477679 |
| 75 | 1 | 0 | 10.025243  | -1.214857 | -1.648063 |
| 76 | 1 | 0 | 10.402685  | -2.591343 | -2.720877 |
| 77 | 1 | 0 | 9.489046   | -1.194366 | -3.355218 |
| 78 | 6 | 0 | 5.709591   | -3.934022 | 4.980202  |
| 79 | 1 | 0 | 5.621380   | -3.059457 | 5.638278  |
| 80 | 1 | 0 | 5.782951   | -4.837025 | 5.589032  |
| 81 | 1 | 0 | 6.616178   | -3.834529 | 4.368617  |
| 82 | 6 | 0 | -9.656665  | -1.832642 | 2.477664  |
| 83 | 1 | 0 | -10.025244 | -1.214836 | 1.648039  |
| 84 | 1 | 0 | -10.402703 | -2.591315 | 2.720855  |
| 85 | 1 | 0 | -9.489071  | -1.194336 | 3.355201  |
| 86 | 6 | 0 | -5.709576  | -3.934075 | -4.980169 |
| 87 | 1 | 0 | -5.621360  | -3.059520 | -5.638259 |
| 88 | 1 | 0 | -5.782936  | -4.837087 | -5.588985 |
| 89 | 1 | 0 | -6.616163  | -3.834569 | -4.368588 |

(MeOPh)<sub>3</sub>-F<sub>2</sub>PyBTM (3, Ground state, UB3LYP/6-31G(d))

Standard orientation:

| Center<br>Number | Atomic<br>Number | Atomic<br>Type | Coordinates (Angstroms) |           |           |
|------------------|------------------|----------------|-------------------------|-----------|-----------|
|                  |                  |                | X                       | Y         | Z         |
| 1                | 17               | 0              | -0.027504               | 2.376270  | -2.973723 |
| 2                | 17               | 0              | -1.905910               | -0.536824 | -1.608467 |
| 3                | 17               | 0              | 0.362356                | 0.657599  | 2.234348  |
| 4                | 17               | 0              | -2.481496               | 2.988783  | 2.579514  |
| 5                | 7                | 0              | -1.923677               | 6.181620  | -0.886057 |
| 6                | 6                | 0              | 2.038065                | 1.030283  | -1.933378 |
| 7                | 1                | 0              | 2.431902                | 1.128254  | -2.938222 |
| 8                | 6                | 0              | 0.955471                | 0.719719  | 0.578388  |
| 9                | 6                | 0              | -2.898702               | 1.536704  | 1.686050  |
| 10               | 6                | 0              | -0.705641               | 5.761162  | -0.527348 |
| 11               | 1                | 0              | 0.084983                | 6.501839  | -0.437337 |
| 12               | 6                | 0              | -1.400595               | 3.415623  | -0.346276 |
| 13               | 6                | 0              | -3.897376               | 0.749795  | 2.240681  |
| 14               | 6                | 0              | -4.241006               | -0.449755 | 1.626194  |
| 15               | 6                | 0              | 0.801338                | 1.580853  | -1.641627 |
| 16               | 6                | 0              | -0.420704               | 4.429562  | -0.262100 |
| 17               | 6                | 0              | -2.614156               | -0.053493 | -0.077583 |
| 18               | 6                | 0              | -3.615093               | -0.890437 | 0.450604  |
| 19               | 6                | 0              | 2.207755                | 0.136187  | 0.315165  |
| 20               | 6                | 0              | -2.205023               | 1.169135  | 0.509796  |
| 21               | 6                | 0              | 0.192911                | 1.441582  | -0.374106 |
| 22               | 6                | 0              | -2.666225               | 3.914850  | -0.725567 |
| 23               | 6                | 0              | -2.888098               | 5.259858  | -0.982721 |
| 24               | 6                | 0              | -1.135509               | 2.014395  | -0.069860 |
| 25               | 1                | 0              | -3.880804               | 5.587513  | -1.280944 |
| 26               | 9                | 0              | -3.697321               | 3.063335  | -0.871374 |
| 27               | 9                | 0              | 0.830934                | 4.112202  | 0.112516  |
| 28               | 6                | 0              | 2.757646                | 0.297684  | -0.980359 |
| 29               | 6                | 0              | 2.964016                | -0.578155 | 1.387734  |
| 30               | 6                | 0              | 2.506301                | -1.798949 | 1.913493  |
| 31               | 6                | 0              | 4.158938                | -0.053950 | 1.888356  |
| 32               | 6                | 0              | 3.221101                | -2.470301 | 2.895030  |

|    |    |   |           |           |           |
|----|----|---|-----------|-----------|-----------|
| 33 | 1  | 0 | 1.578367  | -2.226464 | 1.543778  |
| 34 | 6  | 0 | 4.886064  | -0.712853 | 2.882215  |
| 35 | 1  | 0 | 4.534175  | 0.887698  | 1.498070  |
| 36 | 6  | 0 | 4.418352  | -1.930218 | 3.389101  |
| 37 | 1  | 0 | 2.872253  | -3.415482 | 3.299038  |
| 38 | 1  | 0 | 5.806083  | -0.270769 | 3.246836  |
| 39 | 1  | 0 | -4.388533 | 1.057671  | 3.155132  |
| 40 | 6  | 0 | -4.005445 | -2.172496 | -0.207172 |
| 41 | 6  | 0 | -3.246243 | -3.337405 | -0.012286 |
| 42 | 6  | 0 | -5.139664 | -2.245124 | -1.019022 |
| 43 | 6  | 0 | -3.611726 | -4.534384 | -0.611513 |
| 44 | 1  | 0 | -2.361477 | -3.301912 | 0.617199  |
| 45 | 6  | 0 | -5.517808 | -3.441861 | -1.631450 |
| 46 | 1  | 0 | -5.740590 | -1.354812 | -1.182210 |
| 47 | 6  | 0 | -4.751371 | -4.595035 | -1.427566 |
| 48 | 1  | 0 | -3.030607 | -5.439044 | -0.463266 |
| 49 | 1  | 0 | -6.402379 | -3.460498 | -2.257445 |
| 50 | 6  | 0 | 4.068659  | -0.271915 | -1.396955 |
| 51 | 6  | 0 | 4.400759  | -1.625600 | -1.196013 |
| 52 | 6  | 0 | 4.996208  | 0.531427  | -2.073178 |
| 53 | 6  | 0 | 5.602837  | -2.144725 | -1.651094 |
| 54 | 1  | 0 | 3.702452  | -2.280583 | -0.686572 |
| 55 | 6  | 0 | 6.215609  | 0.025571  | -2.528713 |
| 56 | 1  | 0 | 4.773720  | 1.583103  | -2.233562 |
| 57 | 6  | 0 | 6.523862  | -1.322927 | -2.319490 |
| 58 | 1  | 0 | 5.852741  | -3.190824 | -1.504611 |
| 59 | 1  | 0 | 6.908037  | 0.687272  | -3.036291 |
| 60 | 8  | 0 | -5.024740 | -5.815586 | -1.971033 |
| 61 | 8  | 0 | 5.045024  | -2.663943 | 4.353183  |
| 62 | 8  | 0 | 7.677211  | -1.929185 | -2.720379 |
| 63 | 6  | 0 | 8.640412  | -1.150961 | -3.413747 |
| 64 | 1  | 0 | 9.011651  | -0.323119 | -2.795229 |
| 65 | 1  | 0 | 9.465063  | -1.828831 | -3.640983 |
| 66 | 1  | 0 | 8.234113  | -0.747065 | -4.350373 |
| 67 | 6  | 0 | 6.258622  | -2.165836 | 4.893993  |
| 68 | 1  | 0 | 6.113445  | -1.193905 | 5.383782  |
| 69 | 1  | 0 | 6.578360  | -2.899245 | 5.636445  |
| 70 | 1  | 0 | 7.034348  | -2.068553 | 4.122939  |
| 71 | 6  | 0 | -6.165074 | -5.939706 | -2.806536 |
| 72 | 1  | 0 | -6.090333 | -5.292426 | -3.690293 |
| 73 | 1  | 0 | -6.189783 | -6.983295 | -3.125277 |
| 74 | 1  | 0 | -7.090363 | -5.704310 | -2.264283 |
| 75 | 17 | 0 | -5.492173 | -1.415445 | 2.384492  |

-----

Ph<sub>4</sub>-F<sub>2</sub>PyBTM (1, First doublet excited state, UM06-2X/6-31G(d))

Standard orientation:

| Center Number | Atomic Number | Atomic Type | Coordinates (Angstroms) |           |           |
|---------------|---------------|-------------|-------------------------|-----------|-----------|
|               |               |             | X                       | Y         | Z         |
| 1             | 17            | 0           | 1.942433                | 2.754745  | -2.336188 |
| 2             | 17            | 0           | -0.472028               | -0.438610 | -1.966270 |
| 3             | 17            | 0           | 0.494254                | -0.337828 | 1.921836  |
| 4             | 17            | 0           | -1.880963               | 2.712777  | 2.295712  |
| 5             | 7             | 0           | -0.143921               | 6.209014  | -0.006229 |
| 6             | 6             | 0           | 3.437915                | 0.826939  | -1.264149 |
| 7             | 1             | 0           | 4.137801                | 1.110215  | -2.043159 |
| 8             | 6             | 0           | 1.600719                | 0.077754  | 0.629217  |
| 9             | 6             | 0           | -2.233852               | 1.510878  | 1.114724  |
| 10            | 6             | 0           | 0.956286                | 5.544357  | 0.360669  |
| 11            | 1             | 0           | 1.818778                | 6.122531  | 0.680556  |
| 12            | 6             | 0           | -0.030520               | 3.336662  | -0.021787 |
| 13            | 6             | 0           | -3.434927               | 0.870670  | 1.197858  |
| 14            | 6             | 0           | -3.720135               | -0.276060 | 0.425309  |
| 15            | 6             | 0           | 2.246687                | 1.516728  | -1.150337 |
| 16            | 6             | 0           | 1.041949                | 4.165718  | 0.365917  |
| 17            | 6             | 0           | -1.544323               | -0.025383 | -0.662370 |
| 18            | 6             | 0           | -2.721145               | -0.725191 | -0.531343 |
| 19            | 6             | 0           | 2.777715                | -0.669235 | 0.514919  |
| 20            | 6             | 0           | -1.201067               | 1.152989  | 0.123477  |
| 21            | 6             | 0           | 1.267337                | 1.184036  | -0.189659 |
| 22            | 6             | 0           | -1.156226               | 4.090810  | -0.406512 |

|    |   |   |           |           |           |
|----|---|---|-----------|-----------|-----------|
| 23 | 6 | 0 | -1.189763 | 5.473234  | -0.379370 |
| 24 | 6 | 0 | -0.002302 | 1.895497  | -0.042424 |
| 25 | 1 | 0 | -2.096739 | 5.986153  | -0.687812 |
| 26 | 9 | 0 | -2.256337 | 3.431196  | -0.811130 |
| 27 | 9 | 0 | 2.189082  | 3.604671  | 0.772185  |
| 28 | 6 | 0 | 3.724810  | -0.271231 | -0.448319 |
| 29 | 6 | 0 | 3.055155  | -1.819362 | 1.422631  |
| 30 | 6 | 0 | 2.265137  | -2.971155 | 1.371425  |
| 31 | 6 | 0 | 4.135358  | -1.774284 | 2.305936  |
| 32 | 6 | 0 | 2.554151  | -4.061565 | 2.184687  |
| 33 | 1 | 0 | 1.425986  | -3.006573 | 0.681096  |
| 34 | 6 | 0 | 4.421275  | -2.862608 | 3.124658  |
| 35 | 1 | 0 | 4.757066  | -0.884076 | 2.338996  |
| 36 | 6 | 0 | 3.633605  | -4.008989 | 3.064085  |
| 37 | 1 | 0 | 1.937349  | -4.953530 | 2.131995  |
| 38 | 1 | 0 | 5.263363  | -2.815544 | 3.808041  |
| 39 | 1 | 0 | 3.859674  | -4.859530 | 3.699740  |
| 40 | 1 | 0 | -4.131403 | 1.172924  | 1.972022  |
| 41 | 6 | 0 | -3.035955 | -1.867474 | -1.426603 |
| 42 | 6 | 0 | -2.227023 | -3.009525 | -1.430827 |
| 43 | 6 | 0 | -4.169706 | -1.828065 | -2.244098 |
| 44 | 6 | 0 | -2.557643 | -4.099285 | -2.226693 |
| 45 | 1 | 0 | -1.347334 | -3.039435 | -0.794010 |
| 46 | 6 | 0 | -4.487002 | -2.912074 | -3.056024 |
| 47 | 1 | 0 | -4.800852 | -0.944039 | -2.239468 |
| 48 | 6 | 0 | -3.687007 | -4.051458 | -3.043140 |
| 49 | 1 | 0 | -1.931628 | -4.985814 | -2.213867 |
| 50 | 1 | 0 | -5.363793 | -2.868101 | -3.694024 |
| 51 | 1 | 0 | -3.940508 | -4.900979 | -3.669446 |
| 52 | 6 | 0 | -4.974808 | -0.977341 | 0.680022  |
| 53 | 6 | 0 | -5.072448 | -2.385997 | 0.703339  |
| 54 | 6 | 0 | -6.135131 | -0.228155 | 0.972820  |
| 55 | 6 | 0 | -6.274823 | -3.006539 | 1.004666  |
| 56 | 1 | 0 | -4.191904 | -2.989068 | 0.514477  |
| 57 | 6 | 0 | -7.338149 | -0.855175 | 1.256617  |
| 58 | 1 | 0 | -6.090608 | 0.855947  | 0.932617  |
| 59 | 6 | 0 | -7.414004 | -2.248325 | 1.276426  |
| 60 | 1 | 0 | -6.323287 | -4.090235 | 1.033793  |
| 61 | 1 | 0 | -8.221582 | -0.257921 | 1.457910  |
| 62 | 1 | 0 | -8.354452 | -2.739659 | 1.504416  |
| 63 | 6 | 0 | 5.021150  | -0.970936 | -0.655462 |
| 64 | 6 | 0 | 5.096784  | -2.361345 | -0.803966 |
| 65 | 6 | 0 | 6.198578  | -0.220618 | -0.751546 |
| 66 | 6 | 0 | 6.318336  | -2.980906 | -1.039056 |
| 67 | 1 | 0 | 4.191245  | -2.956358 | -0.738938 |
| 68 | 6 | 0 | 7.422296  | -0.842135 | -0.982338 |
| 69 | 1 | 0 | 6.151591  | 0.857815  | -0.625801 |
| 70 | 6 | 0 | 7.485658  | -2.224799 | -1.126985 |
| 71 | 1 | 0 | 6.358261  | -4.059349 | -1.157219 |
| 72 | 1 | 0 | 8.326305  | -0.244256 | -1.045263 |
| 73 | 1 | 0 | 8.438945  | -2.711783 | -1.307441 |

(MeOPh)<sub>4</sub>-F<sub>2</sub>PyBTM (2, First doublet excited state, UM06-2X/6-31G(d))

Standard orientation:

| Center Number | Atomic Number | Atomic Type | Coordinates (Angstroms) |          |           |
|---------------|---------------|-------------|-------------------------|----------|-----------|
|               |               |             | X                       | Y        | Z         |
| 1             | 17            | 0           | 1.822639                | 3.271310 | -2.368548 |
| 2             | 17            | 0           | -0.556664               | 0.228973 | -1.939713 |
| 3             | 17            | 0           | 0.532696                | 0.228980 | 2.008347  |
| 4             | 17            | 0           | -1.900394               | 3.327446 | 2.351814  |
| 5             | 7             | 0           | 0.037843                | 6.795793 | -0.096872 |
| 6             | 6             | 0           | 3.395405                | 1.443407 | -1.280234 |
| 7             | 1             | 0           | 4.059120                | 1.725826 | -2.089693 |
| 8             | 6             | 0           | 1.557632                | 0.597179 | 0.647983  |
| 9             | 6             | 0           | -2.223041               | 2.071869 | 1.187414  |
| 10            | 6             | 0           | 1.108266                | 6.084894 | 0.257036  |
| 11            | 1             | 0           | 2.012770                | 6.620252 | 0.533549  |
| 12            | 6             | 0           | -0.010735               | 3.916278 | -0.038708 |
| 13            | 6             | 0           | -3.400404               | 1.366943 | 1.346219  |



|    |   |   |            |           |           |
|----|---|---|------------|-----------|-----------|
| 14 | 6 | 0 | -3.699782  | 0.259898  | 0.547569  |
| 15 | 6 | 0 | 2.199195   | 2.086515  | -1.170778 |
| 16 | 6 | 0 | 1.107156   | 4.703306  | 0.303304  |
| 17 | 6 | 0 | -1.615435  | 0.633239  | -0.601828 |
| 18 | 6 | 0 | -2.779447  | -0.128252 | -0.446593 |
| 19 | 6 | 0 | 2.739722   | -0.102749 | 0.513450  |
| 20 | 6 | 0 | -1.268894  | 1.746993  | 0.200063  |
| 21 | 6 | 0 | 1.193361   | 1.744007  | -0.156556 |
| 22 | 6 | 0 | -1.109801  | 4.719749  | -0.407985 |
| 23 | 6 | 0 | -1.055820  | 6.099844  | -0.422554 |
| 24 | 6 | 0 | -0.013817  | 2.477635  | 0.011824  |
| 25 | 1 | 0 | -1.941260  | 6.652702  | -0.724553 |
| 26 | 9 | 0 | -2.257745  | 4.130864  | -0.774768 |
| 27 | 9 | 0 | 2.235282   | 4.078518  | 0.689726  |
| 28 | 6 | 0 | 3.702672   | 0.308138  | -0.496308 |
| 29 | 6 | 0 | 3.108196   | -1.186318 | 1.449502  |
| 30 | 6 | 0 | 2.287340   | -2.314375 | 1.623968  |
| 31 | 6 | 0 | 4.316041   | -1.129984 | 2.150497  |
| 32 | 6 | 0 | 2.676246   | -3.350947 | 2.448069  |
| 33 | 1 | 0 | 1.348089   | -2.377857 | 1.083215  |
| 34 | 6 | 0 | 4.706966   | -2.153378 | 3.008180  |
| 35 | 1 | 0 | 4.959740   | -0.263616 | 2.030266  |
| 36 | 6 | 0 | 3.888166   | -3.275381 | 3.152536  |
| 37 | 1 | 0 | 2.061610   | -4.235228 | 2.576406  |
| 38 | 1 | 0 | 5.641924   | -2.067492 | 3.548268  |
| 39 | 1 | 0 | -4.076307  | 1.645728  | 2.147644  |
| 40 | 6 | 0 | -3.070955  | -1.286192 | -1.337222 |
| 41 | 6 | 0 | -2.256347  | -2.426320 | -1.324572 |
| 42 | 6 | 0 | -4.189810  | -1.283150 | -2.164965 |
| 43 | 6 | 0 | -2.557528  | -3.526550 | -2.107598 |
| 44 | 1 | 0 | -1.379960  | -2.443985 | -0.681663 |
| 45 | 6 | 0 | -4.504728  | -2.380012 | -2.965794 |
| 46 | 1 | 0 | -4.838111  | -0.411562 | -2.177232 |
| 47 | 6 | 0 | -3.686386  | -3.508993 | -2.935199 |
| 48 | 1 | 0 | -1.937730  | -4.416900 | -2.100864 |
| 49 | 1 | 0 | -5.383989  | -2.341119 | -3.597599 |
| 50 | 6 | 0 | -4.978608  | -0.454740 | 0.799459  |
| 51 | 6 | 0 | -5.045605  | -1.851437 | 0.935265  |
| 52 | 6 | 0 | -6.158981  | 0.272028  | 0.954380  |
| 53 | 6 | 0 | -6.242979  | -2.484394 | 1.211415  |
| 54 | 1 | 0 | -4.142867  | -2.444223 | 0.826623  |
| 55 | 6 | 0 | -7.376184  | -0.351588 | 1.228669  |
| 56 | 1 | 0 | -6.134491  | 1.352610  | 0.841059  |
| 57 | 6 | 0 | -7.419231  | -1.738770 | 1.358127  |
| 58 | 1 | 0 | -6.299191  | -3.561852 | 1.324487  |
| 59 | 1 | 0 | -8.270664  | 0.251152  | 1.332167  |
| 60 | 6 | 0 | 4.910584   | -0.431246 | -0.804349 |
| 61 | 6 | 0 | 4.991959   | -1.850031 | -0.751132 |
| 62 | 6 | 0 | 6.064356   | 0.260930  | -1.240737 |
| 63 | 6 | 0 | 6.143837   | -2.513139 | -1.102240 |
| 64 | 1 | 0 | 4.119165   | -2.425496 | -0.466535 |
| 65 | 6 | 0 | 7.233916   | -0.396065 | -1.579884 |
| 66 | 1 | 0 | 6.050779   | 1.345887  | -1.265381 |
| 67 | 6 | 0 | 7.282122   | -1.796566 | -1.514181 |
| 68 | 1 | 0 | 6.198441   | -3.596119 | -1.086184 |
| 69 | 1 | 0 | 8.100236   | 0.179641  | -1.882462 |
| 70 | 8 | 0 | -8.544165  | -2.453918 | 1.623391  |
| 71 | 8 | 0 | -3.900261  | -4.635275 | -3.665571 |
| 72 | 8 | 0 | 4.173962   | -4.335857 | 3.940064  |
| 73 | 8 | 0 | 8.360166   | -2.537217 | -1.826488 |
| 74 | 6 | 0 | 9.523185   | -1.868176 | -2.278501 |
| 75 | 1 | 0 | 9.914607   | -1.195531 | -1.507369 |
| 76 | 1 | 0 | 10.254062  | -2.647729 | -2.487928 |
| 77 | 1 | 0 | 9.318932   | -1.300019 | -3.192522 |
| 78 | 6 | 0 | 5.374954   | -4.299173 | 4.683180  |
| 79 | 1 | 0 | 5.385060   | -3.450420 | 5.376634  |
| 80 | 1 | 0 | 5.408353   | -5.230451 | 5.247286  |
| 81 | 1 | 0 | 6.247811   | -4.239882 | 4.022514  |
| 82 | 6 | 0 | -9.744546  | -1.734508 | 1.792089  |
| 83 | 1 | 0 | -10.009406 | -1.180728 | 0.883002  |
| 84 | 1 | 0 | -10.515814 | -2.475429 | 2.002004  |
| 85 | 1 | 0 | -9.674552  | -1.032998 | 2.632350  |
| 86 | 6 | 0 | -5.030182  | -4.656594 | -4.508434 |
| 87 | 1 | 0 | -4.976606  | -3.866779 | -5.267602 |
| 88 | 1 | 0 | -5.024986  | -5.630327 | -4.998101 |
| 89 | 1 | 0 | -5.957988  | -4.541896 | -3.934842 |

(MeOPh)<sub>3</sub>-F<sub>2</sub>PyBTM (3, First doublet excited state, UM06-2X/6-31G(d))

Standard orientation:

| Center<br>Number | Atomic<br>Number | Atomic<br>Type | Coordinates (Angstroms) |           |           |
|------------------|------------------|----------------|-------------------------|-----------|-----------|
|                  |                  |                | X                       | Y         | Z         |
| 1                | 17               | 0              | -0.046529               | 2.393843  | -2.964511 |
| 2                | 17               | 0              | -1.787148               | -0.614292 | -1.569459 |
| 3                | 17               | 0              | 0.222951                | 0.667323  | 2.225848  |
| 4                | 17               | 0              | -2.743900               | 2.985748  | 2.502307  |
| 5                | 7                | 0              | -1.980163               | 6.249214  | -0.919430 |
| 6                | 6                | 0              | 2.039216                | 1.154269  | -1.881316 |
| 7                | 1                | 0              | 2.452976                | 1.279994  | -2.875453 |
| 8                | 6                | 0              | 0.840143                | 0.752545  | 0.580883  |
| 9                | 6                | 0              | -3.058125               | 1.510839  | 1.597382  |
| 10               | 6                | 0              | -0.747240               | 5.766523  | -0.704048 |
| 11               | 1                | 0              | 0.085141                | 6.467113  | -0.732639 |
| 12               | 6                | 0              | -1.487304               | 3.428893  | -0.359707 |
| 13               | 6                | 0              | -4.049460               | 0.693201  | 2.120639  |
| 14               | 6                | 0              | -4.297857               | -0.542277 | 1.535248  |
| 15               | 6                | 0              | 0.757954                | 1.626903  | -1.625315 |
| 16               | 6                | 0              | -0.487507               | 4.438552  | -0.429660 |
| 17               | 6                | 0              | -2.607947               | -0.099426 | -0.092010 |
| 18               | 6                | 0              | -3.578796               | -0.981229 | 0.415081  |
| 19               | 6                | 0              | 2.137584                | 0.213938  | 0.343522  |
| 20               | 6                | 0              | -2.283903               | 1.175288  | 0.452924  |
| 21               | 6                | 0              | 0.089312                | 1.476248  | -0.367504 |
| 22               | 6                | 0              | -2.767832               | 4.000906  | -0.606909 |
| 23               | 6                | 0              | -2.969915               | 5.343296  | -0.862146 |
| 24               | 6                | 0              | -1.240394               | 2.049223  | -0.094469 |
| 25               | 1                | 0              | -3.985234               | 5.689973  | -1.043622 |
| 26               | 9                | 0              | -3.855360               | 3.190394  | -0.614814 |
| 27               | 9                | 0              | 0.810452                | 4.084238  | -0.203357 |
| 28               | 6                | 0              | 2.747783                | 0.427080  | -0.929146 |
| 29               | 6                | 0              | 2.894030                | -0.473496 | 1.396560  |
| 30               | 6                | 0              | 2.339093                | -1.541882 | 2.155541  |
| 31               | 6                | 0              | 4.231616                | -0.083432 | 1.687321  |
| 32               | 6                | 0              | 3.078348                | -2.187950 | 3.117342  |
| 33               | 1                | 0              | 1.332081                | -1.875573 | 1.940109  |
| 34               | 6                | 0              | 4.970229                | -0.692513 | 2.683397  |
| 35               | 1                | 0              | 4.660525                | 0.749282  | 1.143659  |
| 36               | 6                | 0              | 4.401601                | -1.762717 | 3.405608  |
| 37               | 1                | 0              | 2.676521                | -3.026276 | 3.675819  |
| 38               | 1                | 0              | 5.969603                | -0.338826 | 2.905025  |
| 39               | 1                | 0              | -4.603472               | 1.004325  | 2.997511  |
| 40               | 6                | 0              | -3.866734               | -2.303289 | -0.219479 |
| 41               | 6                | 0              | -3.205799               | -3.465183 | 0.207534  |
| 42               | 6                | 0              | -4.813645               | -2.419227 | -1.239606 |
| 43               | 6                | 0              | -3.479150               | -4.698542 | -0.369022 |
| 44               | 1                | 0              | -2.470652               | -3.397830 | 1.004933  |
| 45               | 6                | 0              | -5.100129               | -3.652176 | -1.830609 |
| 46               | 1                | 0              | -5.337658               | -1.532179 | -1.583950 |
| 47               | 6                | 0              | -4.429630               | -4.799934 | -1.394635 |
| 48               | 1                | 0              | -2.971983               | -5.600555 | -0.040528 |
| 49               | 1                | 0              | -5.840812               | -3.701860 | -2.620556 |
| 50               | 6                | 0              | 4.050389                | -0.165337 | -1.315170 |
| 51               | 6                | 0              | 4.340375                | -1.536711 | -1.127464 |
| 52               | 6                | 0              | 5.019740                | 0.619397  | -1.965933 |
| 53               | 6                | 0              | 5.540825                | -2.083771 | -1.547322 |
| 54               | 1                | 0              | 3.593906                | -2.182817 | -0.676438 |
| 55               | 6                | 0              | 6.233001                | 0.083899  | -2.390233 |
| 56               | 1                | 0              | 4.825754                | 1.676589  | -2.122980 |
| 57               | 6                | 0              | 6.502964                | -1.278249 | -2.180556 |
| 58               | 1                | 0              | 5.753591                | -3.140346 | -1.419461 |
| 59               | 1                | 0              | 6.957607                | 0.728076  | -2.874597 |
| 60               | 8                | 0              | -4.627397               | -6.055864 | -1.897923 |
| 61               | 8                | 0              | 5.019744                | -2.440338 | 4.378567  |
| 62               | 8                | 0              | 7.647101                | -1.905530 | -2.550946 |
| 63               | 6                | 0              | 8.638468                | -1.163651 | -3.253357 |
| 64               | 1                | 0              | 9.031393                | -0.341621 | -2.641944 |
| 65               | 1                | 0              | 9.440739                | -1.870891 | -3.467625 |
| 66               | 1                | 0              | 8.243945                | -0.762453 | -4.194796 |

|    |    |   |           |           |           |
|----|----|---|-----------|-----------|-----------|
| 67 | 6  | 0 | 6.357728  | -2.090451 | 4.753190  |
| 68 | 1  | 0 | 6.399155  | -1.060913 | 5.123076  |
| 69 | 1  | 0 | 6.624352  | -2.781540 | 5.551870  |
| 70 | 1  | 0 | 7.042183  | -2.215788 | 3.907957  |
| 71 | 6  | 0 | -5.584982 | -6.218151 | -2.930636 |
| 72 | 1  | 0 | -5.317873 | -5.640079 | -3.825495 |
| 73 | 1  | 0 | -5.584249 | -7.282013 | -3.176174 |
| 74 | 1  | 0 | -6.590238 | -5.923634 | -2.600721 |
| 75 | 17 | 0 | -5.549013 | -1.553266 | 2.252489  |

Ph<sub>4</sub>-F<sub>2</sub>PyBTM (1, First doublet excited state, UB3LYP/6-31G(d))

Standard orientation:

| Center<br>Number | Atomic<br>Number | Atomic<br>Type | Coordinates (Angstroms) |           |           |
|------------------|------------------|----------------|-------------------------|-----------|-----------|
|                  |                  |                | X                       | Y         | Z         |
| 1                | 17               | 0              | -1.838116               | 2.580950  | 2.468278  |
| 2                | 17               | 0              | 0.693384                | -0.253466 | 2.142596  |
| 3                | 17               | 0              | -0.696078               | -0.318580 | -2.071168 |
| 4                | 17               | 0              | 1.743523                | 2.476006  | -2.479591 |
| 5                | 7                | 0              | 0.119686                | 6.173120  | -0.049318 |
| 6                | 6                | 0              | -3.406696               | 0.708199  | 1.382426  |
| 7                | 1                | 0              | -4.052317               | 0.965304  | 2.214566  |
| 8                | 6                | 0              | -1.698237               | 0.037723  | -0.654683 |
| 9                | 6                | 0              | 2.149412                | 1.345017  | -1.237442 |
| 10               | 6                | 0              | -1.000444               | 5.491822  | -0.341148 |
| 11               | 1                | 0              | -1.884996               | 6.064330  | -0.612048 |
| 12               | 6                | 0              | 0.011228                | 3.264115  | -0.007705 |
| 13               | 6                | 0              | 3.384809                | 0.712792  | -1.367963 |
| 14               | 6                | 0              | 3.766866                | -0.312622 | -0.515808 |
| 15               | 6                | 0              | -2.209555               | 1.387698  | 1.229211  |
| 16               | 6                | 0              | -1.082631               | 4.112391  | -0.336234 |
| 17               | 6                | 0              | 1.636912                | 0.041401  | 0.693373  |
| 18               | 6                | 0              | 2.865706                | -0.670639 | 0.557450  |
| 19               | 6                | 0              | -2.884319               | -0.701702 | -0.511724 |
| 20               | 6                | 0              | 1.213110                | 1.073867  | -0.166184 |
| 21               | 6                | 0              | -1.285725               | 1.104540  | 0.191043  |
| 22               | 6                | 0              | 1.159964                | 4.045042  | 0.294496  |
| 23               | 6                | 0              | 1.188552                | 5.426182  | 0.258820  |
| 24               | 6                | 0              | -0.025375               | 1.835131  | 0.010033  |
| 25               | 1                | 0              | 2.114549                | 5.939708  | 0.509621  |
| 26               | 9                | 0              | 2.305930                | 3.395789  | 0.646447  |
| 27               | 9                | 0              | -2.264061               | 3.552258  | -0.688205 |
| 28               | 6                | 0              | -3.768376               | -0.345244 | 0.533611  |
| 29               | 6                | 0              | -3.247084               | -1.777199 | -1.487663 |
| 30               | 6                | 0              | -2.547359               | -2.992314 | -1.519606 |
| 31               | 6                | 0              | -4.308472               | -1.590535 | -2.383447 |
| 32               | 6                | 0              | -2.902582               | -3.996768 | -2.419006 |
| 33               | 1                | 0              | -1.719832               | -3.146261 | -0.832072 |
| 34               | 6                | 0              | -4.661527               | -2.592335 | -3.288070 |
| 35               | 1                | 0              | -4.857846               | -0.653774 | -2.368325 |
| 36               | 6                | 0              | -3.961531               | -3.799305 | -3.307681 |
| 37               | 1                | 0              | -2.351729               | -4.933992 | -2.426872 |
| 38               | 1                | 0              | -5.485684               | -2.428376 | -3.977327 |
| 39               | 1                | 0              | -4.238269               | -4.580796 | -4.010484 |
| 40               | 1                | 0              | 4.006490                | 0.961795  | -2.220163 |
| 41               | 6                | 0              | 3.276135                | -1.690782 | 1.526519  |
| 42               | 6                | 0              | 2.422090                | -2.764239 | 1.885586  |
| 43               | 6                | 0              | 4.562144                | -1.625537 | 2.124215  |
| 44               | 6                | 0              | 2.845529                | -3.731890 | 2.782541  |
| 45               | 1                | 0              | 1.447392                | -2.845517 | 1.420018  |
| 46               | 6                | 0              | 4.958716                | -2.570287 | 3.060457  |
| 47               | 1                | 0              | 5.216853                | -0.797520 | 1.879272  |
| 48               | 6                | 0              | 4.108451                | -3.631980 | 3.385665  |
| 49               | 1                | 0              | 2.193294                | -4.565580 | 3.023652  |
| 50               | 1                | 0              | 5.930884                | -2.483862 | 3.535665  |
| 51               | 1                | 0              | 4.424808                | -4.380373 | 4.106366  |
| 52               | 6                | 0              | 5.020465                | -1.040752 | -0.809920 |
| 53               | 6                | 0              | 5.073289                | -2.450467 | -0.868257 |
| 54               | 6                | 0              | 6.189620                | -0.316802 | -1.123019 |
| 55               | 6                | 0              | 6.251575                | -3.105378 | -1.215827 |
| 56               | 1                | 0              | 4.175999                | -3.028178 | -0.673187 |

|    |   |   |           |           |           |
|----|---|---|-----------|-----------|-----------|
| 57 | 6 | 0 | 7.367469  | -0.975449 | -1.461498 |
| 58 | 1 | 0 | 6.171509  | 0.767991  | -1.070611 |
| 59 | 6 | 0 | 7.404051  | -2.373253 | -1.509704 |
| 60 | 1 | 0 | 6.266667  | -4.190306 | -1.268757 |
| 61 | 1 | 0 | 8.261233  | -0.399257 | -1.683444 |
| 62 | 1 | 0 | 8.323226  | -2.885724 | -1.778712 |
| 63 | 6 | 0 | -5.066896 | -1.029927 | 0.794467  |
| 64 | 6 | 0 | -5.164996 | -2.424975 | 0.927332  |
| 65 | 6 | 0 | -6.230440 | -0.263105 | 0.976698  |
| 66 | 6 | 0 | -6.384251 | -3.029984 | 1.227149  |
| 67 | 1 | 0 | -4.278441 | -3.037557 | 0.801944  |
| 68 | 6 | 0 | -7.451341 | -0.868584 | 1.273977  |
| 69 | 1 | 0 | -6.175797 | 0.816684  | 0.866976  |
| 70 | 6 | 0 | -7.533420 | -2.255747 | 1.400598  |
| 71 | 1 | 0 | -6.435196 | -4.110922 | 1.330071  |
| 72 | 1 | 0 | -8.338947 | -0.254455 | 1.402396  |
| 73 | 1 | 0 | -8.483584 | -2.729805 | 1.632093  |

(MeOph)<sub>4</sub>-F<sub>2</sub>PyBTM (2, First doublet excited state, UB3LYP/6-31G(d))

Standard orientation:

| Center<br>Number | Atomic<br>Number | Atomic<br>Type | Coordinates (Angstroms) |           |           |
|------------------|------------------|----------------|-------------------------|-----------|-----------|
|                  |                  |                | X                       | Y         | Z         |
| 1                | 17               | 0              | 1.662214                | 2.968224  | -2.635656 |
| 2                | 17               | 0              | -0.768658               | 0.181564  | -2.084607 |
| 3                | 17               | 0              | 0.759790                | 0.417557  | 2.128031  |
| 4                | 17               | 0              | -1.796816               | 3.192980  | 2.414643  |
| 5                | 7                | 0              | 0.035235                | 6.739654  | -0.233778 |
| 6                | 6                | 0              | 3.307481                | 1.207225  | -1.519426 |
| 7                | 1                | 0              | 3.898363                | 1.409628  | -2.405519 |
| 8                | 6                | 0              | 1.654602                | 0.646010  | 0.630707  |
| 9                | 6                | 0              | -2.186627               | 1.957709  | 1.220104  |
| 10               | 6                | 0              | 1.121594                | 6.011703  | 0.065272  |
| 11               | 1                | 0              | 2.046063                | 6.543484  | 0.282459  |
| 12               | 6                | 0              | -0.024053               | 3.824567  | -0.125258 |
| 13               | 6                | 0              | -3.367631               | 1.266748  | 1.434693  |
| 14               | 6                | 0              | -3.743548               | 0.183383  | 0.631114  |
| 15               | 6                | 0              | 2.093083                | 1.863137  | -1.362759 |
| 16               | 6                | 0              | 1.118433                | 4.632533  | 0.130694  |
| 17               | 6                | 0              | -1.719416               | 0.562402  | -0.638992 |
| 18               | 6                | 0              | -2.889822               | -0.189100 | -0.434630 |
| 19               | 6                | 0              | 2.872605                | -0.076811 | 0.483894  |
| 20               | 6                | 0              | -1.290505               | 1.659028  | 0.161002  |
| 21               | 6                | 0              | 1.201214                | 1.640550  | -0.260989 |
| 22               | 6                | 0              | -1.137434               | 4.652544  | -0.445664 |
| 23               | 6                | 0              | -1.079147               | 6.032203  | -0.482081 |
| 24               | 6                | 0              | -0.045110               | 2.398564  | -0.075325 |
| 25               | 1                | 0              | -1.981050               | 6.582716  | -0.742152 |
| 26               | 9                | 0              | -2.321046               | 4.067567  | -0.755179 |
| 27               | 9                | 0              | 2.286472                | 4.015738  | 0.472632  |
| 28               | 6                | 0              | 3.718830                | 0.218313  | -0.630333 |
| 29               | 6                | 0              | 3.324341                | -1.043231 | 1.490770  |
| 30               | 6                | 0              | 2.490552                | -2.095166 | 1.963350  |
| 31               | 6                | 0              | 4.638438                | -0.953055 | 2.028700  |
| 32               | 6                | 0              | 2.948627                | -3.003992 | 2.887494  |
| 33               | 1                | 0              | 1.493768                | -2.203159 | 1.555269  |
| 34               | 6                | 0              | 5.095441                | -1.830893 | 2.993376  |
| 35               | 1                | 0              | 5.277734                | -0.140023 | 1.707245  |
| 36               | 6                | 0              | 4.254305                | -2.876221 | 3.427298  |
| 37               | 1                | 0              | 2.332414                | -3.829619 | 3.226372  |
| 38               | 1                | 0              | 6.086823                | -1.703028 | 3.410320  |
| 39               | 1                | 0              | -3.986292               | 1.538853  | 2.282456  |
| 40               | 6                | 0              | -3.269323               | -1.297876 | -1.363866 |
| 41               | 6                | 0              | -2.543530               | -2.500592 | -1.405285 |
| 42               | 6                | 0              | -4.374444               | -1.174655 | -2.210324 |
| 43               | 6                | 0              | -2.911895               | -3.537475 | -2.251436 |
| 44               | 1                | 0              | -1.676789               | -2.620183 | -0.760860 |
| 45               | 6                | 0              | -4.756142               | -2.205115 | -3.073542 |
| 46               | 1                | 0              | -4.952658               | -0.255405 | -2.198325 |
| 47               | 6                | 0              | -4.023613               | -3.395945 | -3.094691 |
| 48               | 1                | 0              | -2.353933               | -4.468497 | -2.280652 |

|    |   |   |            |           |           |
|----|---|---|------------|-----------|-----------|
| 49 | 1 | 0 | -5.618274  | -2.066036 | -3.715833 |
| 50 | 6 | 0 | -5.020597  | -0.511609 | 0.956787  |
| 51 | 6 | 0 | -5.106482  | -1.908274 | 1.115108  |
| 52 | 6 | 0 | -6.185140  | 0.234227  | 1.182924  |
| 53 | 6 | 0 | -6.296290  | -2.522531 | 1.477771  |
| 54 | 1 | 0 | -4.224388  | -2.519760 | 0.957852  |
| 55 | 6 | 0 | -7.392372  | -0.368920 | 1.545973  |
| 56 | 1 | 0 | -6.155597  | 1.313305  | 1.057759  |
| 57 | 6 | 0 | -7.451734  | -1.757629 | 1.695443  |
| 58 | 1 | 0 | -6.355864  | -3.599208 | 1.604773  |
| 59 | 1 | 0 | -8.268503  | 0.250523  | 1.701450  |
| 60 | 6 | 0 | 4.954805   | -0.538019 | -0.935338 |
| 61 | 6 | 0 | 4.991808   | -1.952122 | -0.949370 |
| 62 | 6 | 0 | 6.128097   | 0.144112  | -1.307555 |
| 63 | 6 | 0 | 6.142187   | -2.640229 | -1.294873 |
| 64 | 1 | 0 | 4.090642   | -2.511288 | -0.719003 |
| 65 | 6 | 0 | 7.293385   | -0.534485 | -1.653543 |
| 66 | 1 | 0 | 6.131703   | 1.230306  | -1.303468 |
| 67 | 6 | 0 | 7.308014   | -1.938829 | -1.647641 |
| 68 | 1 | 0 | 6.162314   | -3.725013 | -1.323656 |
| 69 | 1 | 0 | 8.178671   | 0.031494  | -1.919265 |
| 70 | 8 | 0 | -8.572607  | -2.458498 | 2.046195  |
| 71 | 8 | 0 | -4.305011  | -4.471470 | -3.891364 |
| 72 | 8 | 0 | 4.588223   | -3.795958 | 4.340391  |
| 73 | 8 | 0 | 8.383022   | -2.702136 | -1.966652 |
| 74 | 6 | 0 | 9.578526   | -2.057271 | -2.392234 |
| 75 | 1 | 0 | 9.992790   | -1.419444 | -1.601330 |
| 76 | 1 | 0 | 10.283269  | -2.858887 | -2.617029 |
| 77 | 1 | 0 | 9.408467   | -1.456713 | -3.294111 |
| 78 | 6 | 0 | 5.882539   | -3.754400 | 4.951788  |
| 79 | 1 | 0 | 6.022105   | -2.817464 | 5.500845  |
| 80 | 1 | 0 | 5.902711   | -4.595024 | 5.644435  |
| 81 | 1 | 0 | 6.670790   | -3.871945 | 4.200921  |
| 82 | 6 | 0 | -9.765030  | -1.731549 | 2.287389  |
| 83 | 1 | 0 | -10.094874 | -1.185325 | 1.393292  |
| 84 | 1 | 0 | -10.520518 | -2.473178 | 2.554542  |
| 85 | 1 | 0 | -9.646005  | -1.021153 | 3.116628  |
| 86 | 6 | 0 | -5.418160  | -4.381386 | -4.764324 |
| 87 | 1 | 0 | -5.299263  | -3.565193 | -5.489555 |
| 88 | 1 | 0 | -5.459441  | -5.333248 | -5.297675 |
| 89 | 1 | 0 | -6.355855  | -4.235337 | -4.211401 |

(MeOPh)<sub>3</sub>-F<sub>2</sub>PyBTM (3, First doublet excited state, UB3LYP/6-31G(d))

Standard orientation:

| Center Number | Atomic Number | Atomic Type | Coordinates (Angstroms) |           |           |
|---------------|---------------|-------------|-------------------------|-----------|-----------|
|               |               |             | X                       | Y         | Z         |
| 1             | 17            | 0           | -0.046529               | 2.393843  | -2.964511 |
| 2             | 17            | 0           | -1.787148               | -0.614292 | -1.569459 |
| 3             | 17            | 0           | 0.222951                | 0.667323  | 2.225848  |
| 4             | 17            | 0           | -2.743900               | 2.985748  | 2.502307  |
| 5             | 7             | 0           | -1.980163               | 6.249214  | -0.919430 |
| 6             | 6             | 0           | 2.039216                | 1.154269  | -1.881316 |
| 7             | 1             | 0           | 2.452976                | 1.279994  | -2.875453 |
| 8             | 6             | 0           | 0.840143                | 0.752545  | 0.580883  |
| 9             | 6             | 0           | -3.058125               | 1.510839  | 1.597382  |
| 10            | 6             | 0           | -0.747240               | 5.766523  | -0.704048 |
| 11            | 1             | 0           | 0.085141                | 6.467113  | -0.732639 |
| 12            | 6             | 0           | -1.487304               | 3.428893  | -0.359707 |
| 13            | 6             | 0           | -4.049460               | 0.693201  | 2.120639  |
| 14            | 6             | 0           | -4.297857               | -0.542277 | 1.535248  |
| 15            | 6             | 0           | 0.757954                | 1.626903  | -1.625315 |
| 16            | 6             | 0           | -0.487507               | 4.438552  | -0.429660 |
| 17            | 6             | 0           | -2.607947               | -0.099426 | -0.092010 |
| 18            | 6             | 0           | -3.578796               | -0.981229 | 0.415081  |
| 19            | 6             | 0           | 2.137584                | 0.213938  | 0.343522  |
| 20            | 6             | 0           | -2.283903               | 1.175288  | 0.452924  |
| 21            | 6             | 0           | 0.089312                | 1.476248  | -0.367504 |
| 22            | 6             | 0           | -2.767832               | 4.000906  | -0.606909 |
| 23            | 6             | 0           | -2.969915               | 5.343296  | -0.862146 |

|    |    |   |           |           |           |
|----|----|---|-----------|-----------|-----------|
| 24 | 6  | 0 | -1.240394 | 2.049223  | -0.094469 |
| 25 | 1  | 0 | -3.985234 | 5.689973  | -1.043622 |
| 26 | 9  | 0 | -3.855360 | 3.190394  | -0.614814 |
| 27 | 9  | 0 | 0.810452  | 4.084238  | -0.203357 |
| 28 | 6  | 0 | 2.747783  | 0.427080  | -0.929146 |
| 29 | 6  | 0 | 2.894030  | -0.473496 | 1.396560  |
| 30 | 6  | 0 | 2.339093  | -1.541882 | 2.155541  |
| 31 | 6  | 0 | 4.231616  | -0.083432 | 1.687321  |
| 32 | 6  | 0 | 3.078348  | -2.187950 | 3.117342  |
| 33 | 1  | 0 | 1.332081  | -1.875573 | 1.940109  |
| 34 | 6  | 0 | 4.970229  | -0.692513 | 2.683397  |
| 35 | 1  | 0 | 4.660525  | 0.749282  | 1.143659  |
| 36 | 6  | 0 | 4.401601  | -1.762717 | 3.405608  |
| 37 | 1  | 0 | 2.676521  | -3.026276 | 3.675819  |
| 38 | 1  | 0 | 5.969603  | -0.338826 | 2.905025  |
| 39 | 1  | 0 | -4.603472 | 1.004325  | 2.997511  |
| 40 | 6  | 0 | -3.866734 | -2.303289 | -0.219479 |
| 41 | 6  | 0 | -3.205799 | -3.465183 | 0.207534  |
| 42 | 6  | 0 | -4.813645 | -2.419227 | -1.239606 |
| 43 | 6  | 0 | -3.479150 | -4.698542 | -0.369022 |
| 44 | 1  | 0 | -2.470652 | -3.397830 | 1.004933  |
| 45 | 6  | 0 | -5.100129 | -3.652176 | -1.830609 |
| 46 | 1  | 0 | -5.337658 | -1.532179 | -1.583950 |
| 47 | 6  | 0 | -4.429630 | -4.799934 | -1.394635 |
| 48 | 1  | 0 | -2.971983 | -5.600555 | -0.040528 |
| 49 | 1  | 0 | -5.840812 | -3.701860 | -2.620556 |
| 50 | 6  | 0 | 4.050389  | -0.165337 | -1.315170 |
| 51 | 6  | 0 | 4.340375  | -1.536711 | -1.127464 |
| 52 | 6  | 0 | 5.019740  | 0.619397  | -1.965933 |
| 53 | 6  | 0 | 5.540825  | -2.083771 | -1.547322 |
| 54 | 1  | 0 | 3.593906  | -2.182817 | -0.676438 |
| 55 | 6  | 0 | 6.233001  | 0.083899  | -2.390233 |
| 56 | 1  | 0 | 4.825754  | 1.676589  | -2.122980 |
| 57 | 6  | 0 | 6.502964  | -1.278249 | -2.180556 |
| 58 | 1  | 0 | 5.753591  | -3.140346 | -1.419461 |
| 59 | 1  | 0 | 6.957607  | 0.728076  | -2.874597 |
| 60 | 8  | 0 | -4.627397 | -6.055864 | -1.897923 |
| 61 | 8  | 0 | 5.019744  | -2.440338 | 4.378567  |
| 62 | 8  | 0 | 7.647101  | -1.905530 | -2.550946 |
| 63 | 6  | 0 | 8.638468  | -1.163651 | -3.253357 |
| 64 | 1  | 0 | 9.031393  | -0.341621 | -2.641944 |
| 65 | 1  | 0 | 9.440739  | -1.870891 | -3.467625 |
| 66 | 1  | 0 | 8.243945  | -0.762453 | -4.194796 |
| 67 | 6  | 0 | 6.357728  | -2.090451 | 4.753190  |
| 68 | 1  | 0 | 6.399155  | -1.060913 | 5.123076  |
| 69 | 1  | 0 | 6.624352  | -2.781540 | 5.551870  |
| 70 | 1  | 0 | 7.042183  | -2.215788 | 3.907957  |
| 71 | 6  | 0 | -5.584982 | -6.218151 | -2.930636 |
| 72 | 1  | 0 | -5.317873 | -5.640079 | -3.825495 |
| 73 | 1  | 0 | -5.584249 | -7.282013 | -3.176174 |
| 74 | 1  | 0 | -6.590238 | -5.923634 | -2.600721 |
| 75 | 17 | 0 | -5.549013 | -1.553266 | 2.252489  |

---

## Results of TD-DFT calculations

Ph<sub>4</sub>-F<sub>2</sub>PyBTM (1, Optimized ground state structure, UB3LYP/6-31G(d))

Excitation energies and oscillator strengths:

```
Excited State 1: 2.146-A      2.4164 eV  513.09 nm  f=0.0652  <S**2>=0.901
 185A ->186A      -0.17024
 172B ->185B      -0.14043
 173B ->185B       0.12848
 174B ->185B       0.14890
 180B ->185B      -0.16243
 182B ->185B       0.15531
 184B ->185B       0.90219
```

This state for optimization and/or second-order correction.

Total Energy, E(TD-HF/TD-DFT) = -3709.99947978

Copying the excited state density for this state as the 1-particle RhoCI density.

```
Excited State 2: 2.112-A      2.4677 eV  502.42 nm  f=0.0108  <S**2>=0.865
 185A ->187A      -0.13478
 171B ->185B      -0.12240
 175B ->185B      -0.16544
 178B ->185B      -0.19404
 183B ->185B       0.92740
```

```
Excited State 3: 2.098-A      2.6331 eV  470.86 nm  f=0.0090  <S**2>=0.850
 173B ->185B       0.14232
 179B ->185B       0.12991
 180B ->185B       0.17086
 182B ->185B       0.92206
 184B ->185B      -0.19511
```

```
Excited State 4: 2.170-A      2.6910 eV  460.73 nm  f=0.0139  <S**2>=0.927
 185A ->187A      -0.22285
 171B ->185B      -0.25968
 177B ->185B      -0.18561
 181B ->185B       0.88623
```

```
Excited State 5: 2.126-A      2.7489 eV  451.03 nm  f=0.0074  <S**2>=0.880
 176B ->185B      -0.36841
 180B ->185B       0.87601
 184B ->185B       0.15517
```

```
Excited State 6: 2.240-A      2.9937 eV  414.15 nm  f=0.0002  <S**2>=1.004
 172B ->185B       0.42784
 172B ->187B       0.11356
 173B ->185B       0.67191
 173B ->187B       0.14351
 174B ->185B       0.47673
 176B ->185B      -0.12532
 179B ->185B       0.12698
```

```
Excited State 7: 2.172-A      3.0676 eV  404.17 nm  f=0.0132  <S**2>=0.929
 185A ->187A       0.34188
 185A ->190A       0.11018
 170B ->185B       0.17509
 171B ->185B       0.30561
 175B ->185B       0.37437
 178B ->185B       0.59693
 181B ->185B       0.25289
 183B ->185B       0.34057
```

```
Excited State 8: 2.527-A      3.1146 eV  398.08 nm  f=0.0940  <S**2>=1.346
 183A ->188A      -0.10760
 184A ->187A      -0.12276
 185A ->186A       0.63015
 172B ->185B       0.24163
 174B ->185B      -0.23908
 176B ->185B       0.25841
 179B ->185B      -0.23011
 180B ->185B       0.13640
 182B ->185B       0.14742
 183B ->186B       0.14490
 184B ->185B       0.30851
 184B ->187B       0.11744
```

|               |     |         |           |           |          |              |
|---------------|-----|---------|-----------|-----------|----------|--------------|
| Excited State | 9:  | 2.124-A | 3.1902 eV | 388.64 nm | f=0.0056 | <S**2>=0.878 |
| 185A          | ->  | 187A    | 0.38423   |           |          |              |
| 185A          | ->  | 190A    | 0.10326   |           |          |              |
| 170B          | ->  | 185B    | 0.27614   |           |          |              |
| 171B          | ->  | 185B    | 0.21400   |           |          |              |
| 175B          | ->  | 185B    | -0.10385  |           |          |              |
| 177B          | ->  | 185B    | 0.59695   |           |          |              |
| 178B          | ->  | 185B    | -0.47229  |           |          |              |
| 181B          | ->  | 185B    | 0.27248   |           |          |              |
| Excited State | 10: | 2.066-A | 3.2166 eV | 385.46 nm | f=0.0020 | <S**2>=0.818 |
| 174B          | ->  | 185B    | -0.17299  |           |          |              |
| 176B          | ->  | 185B    | 0.44477   |           |          |              |
| 179B          | ->  | 185B    | 0.82575   |           |          |              |
| 180B          | ->  | 185B    | 0.20208   |           |          |              |
| 182B          | ->  | 185B    | -0.19643  |           |          |              |
| Excited State | 11: | 2.232-A | 3.2462 eV | 381.93 nm | f=0.0808 | <S**2>=0.995 |
| 185A          | ->  | 186A    | -0.43120  |           |          |              |
| 172B          | ->  | 185B    | 0.27763   |           |          |              |
| 173B          | ->  | 185B    | 0.17756   |           |          |              |
| 174B          | ->  | 185B    | -0.15846  |           |          |              |
| 176B          | ->  | 185B    | 0.58006   |           |          |              |
| 179B          | ->  | 185B    | -0.42423  |           |          |              |
| 180B          | ->  | 185B    | 0.25526   |           |          |              |
| 182B          | ->  | 185B    | -0.10673  |           |          |              |
| Excited State | 12: | 2.131-A | 3.2560 eV | 380.79 nm | f=0.0101 | <S**2>=0.885 |
| 185A          | ->  | 187A    | -0.24440  |           |          |              |
| 185A          | ->  | 190A    | -0.12636  |           |          |              |
| 170B          | ->  | 185B    | -0.28008  |           |          |              |
| 171B          | ->  | 185B    | -0.18217  |           |          |              |
| 177B          | ->  | 185B    | 0.74064   |           |          |              |
| 178B          | ->  | 185B    | 0.44061   |           |          |              |
| Excited State | 13: | 3.086-A | 3.3324 eV | 372.05 nm | f=0.0420 | <S**2>=2.130 |
| 181A          | ->  | 187A    | 0.11872   |           |          |              |
| 182A          | ->  | 188A    | -0.16906  |           |          |              |
| 183A          | ->  | 187A    | 0.11403   |           |          |              |
| 183A          | ->  | 189A    | 0.17162   |           |          |              |
| 184A          | ->  | 186A    | 0.32764   |           |          |              |
| 185A          | ->  | 187A    | -0.27273  |           |          |              |
| 185A          | ->  | 189A    | -0.12987  |           |          |              |
| 185A          | ->  | 190A    | 0.13634   |           |          |              |
| 170B          | ->  | 185B    | 0.29468   |           |          |              |
| 171B          | ->  | 185B    | 0.20828   |           |          |              |
| 177B          | ->  | 185B    | 0.15606   |           |          |              |
| 178B          | ->  | 185B    | 0.22529   |           |          |              |
| 181B          | ->  | 185B    | -0.13343  |           |          |              |
| 181B          | ->  | 187B    | -0.12142  |           |          |              |
| 182B          | ->  | 188B    | 0.16519   |           |          |              |
| 183B          | ->  | 187B    | -0.17191  |           |          |              |
| 183B          | ->  | 189B    | -0.14912  |           |          |              |
| 184B          | ->  | 186B    | -0.32197  |           |          |              |
| Excited State | 14: | 2.213-A | 3.3810 eV | 366.71 nm | f=0.0080 | <S**2>=0.974 |
| 185A          | ->  | 186A    | 0.15896   |           |          |              |
| 172B          | ->  | 185B    | -0.54991  |           |          |              |
| 174B          | ->  | 185B    | 0.58587   |           |          |              |
| 176B          | ->  | 185B    | 0.44660   |           |          |              |
| 179B          | ->  | 185B    | -0.16508  |           |          |              |
| 180B          | ->  | 185B    | 0.10290   |           |          |              |
| Excited State | 15: | 2.134-A | 3.3898 eV | 365.76 nm | f=0.0200 | <S**2>=0.888 |
| 185A          | ->  | 187A    | -0.26000  |           |          |              |
| 170B          | ->  | 185B    | -0.16404  |           |          |              |
| 175B          | ->  | 185B    | 0.84654   |           |          |              |
| 177B          | ->  | 185B    | 0.12604   |           |          |              |
| 178B          | ->  | 185B    | -0.34821  |           |          |              |

(MeOPh)<sub>4</sub>-F<sub>2</sub>PyBTM (2, Optimized ground state structure, UB3LYP/6-31G(d))

Excitation energies and oscillator strengths:



Excited State 1: 2.086-A 2.0895 eV 593.37 nm f=0.0837 <S\*\*2>=0.838  
207B ->217B 0.10827  
216B ->217B 0.97058  
This state for optimization and/or second-order correction.  
Total Energy, E(TD-HF/TD-DFT) = -4168.10412119  
Copying the excited state density for this state as the 1-particle RhoCI density.

Excited State 2: 2.077-A 2.1521 eV 576.12 nm f=0.0182 <S\*\*2>=0.829  
212B ->217B 0.16664  
215B ->217B 0.97020

Excited State 3: 2.089-A 2.4215 eV 512.02 nm f=0.0252 <S\*\*2>=0.841  
205B ->217B -0.11295  
209B ->217B -0.11752  
210B ->217B 0.14679  
211B ->217B 0.25023  
213B ->217B 0.92048

Excited State 4: 2.098-A 2.4433 eV 507.45 nm f=0.0117 <S\*\*2>=0.851  
217A ->219A -0.10951  
204B ->217B 0.20709  
212B ->217B -0.15886  
214B ->217B 0.94595

Excited State 5: 2.126-A 2.7554 eV 449.96 nm f=0.0078 <S\*\*2>=0.880  
210B ->217B 0.79134  
211B ->217B -0.55291

Excited State 6: 2.102-A 2.7980 eV 443.12 nm f=0.0017 <S\*\*2>=0.854  
217A ->219A -0.12206  
204B ->217B 0.16510  
208B ->217B 0.14257  
212B ->217B 0.92234  
215B ->217B -0.20257

Excited State 7: 2.093-A 2.8997 eV 427.58 nm f=0.0092 <S\*\*2>=0.845  
209B ->217B -0.19851  
210B ->217B 0.50469  
211B ->217B 0.73965  
213B ->217B -0.33139

Excited State 8: 2.293-A 2.9366 eV 422.20 nm f=0.0120 <S\*\*2>=1.064  
217A ->218A 0.34787  
203B ->217B -0.16270  
203B ->219B -0.10597  
205B ->217B 0.46207  
207B ->217B 0.60266  
209B ->217B 0.27090  
211B ->217B 0.16845  
213B ->217B 0.15682  
216B ->217B -0.17417

Excited State 9: 2.339-A 2.9870 eV 415.07 nm f=0.0042 <S\*\*2>=1.118  
215A ->219A -0.11166  
216A ->218A -0.10781  
217A ->219A -0.51085  
202B ->217B -0.18770  
204B ->217B 0.60435  
206B ->217B 0.15894  
212B ->217B -0.24701  
214B ->217B -0.28037  
216B ->218B 0.10732

Excited State 10: 2.526-A 3.0488 eV 406.66 nm f=0.0452 <S\*\*2>=1.345  
216A ->219A 0.10846  
217A ->218A 0.47762  
203B ->217B 0.70287  
203B ->219B 0.12992  
205B ->217B -0.18142  
207B ->217B -0.11794  
215B ->218B 0.12515  
216B ->219B -0.10995

Excited State 11: 2.491-A 3.2205 eV 384.98 nm f=0.1131 <S\*\*2>=1.301  
216A ->219A -0.12145  
217A ->218A -0.47121  
203B ->217B 0.58187

|                   |          |           |           |          |              |
|-------------------|----------|-----------|-----------|----------|--------------|
| 203B ->219B       | 0.10198  |           |           |          |              |
| 205B ->217B       | 0.13814  |           |           |          |              |
| 207B ->217B       | 0.33502  |           |           |          |              |
| 209B ->217B       | 0.30297  |           |           |          |              |
| 214B ->218B       | -0.10056 |           |           |          |              |
| 215B ->218B       | -0.15687 |           |           |          |              |
| 216B ->219B       | 0.12279  |           |           |          |              |
|                   |          |           |           |          |              |
| Excited State 12: | 3.156-A  | 3.2539 eV | 381.03 nm | f=0.0189 | <S**2>=2.240 |
| 204A ->219A       | -0.12164 |           |           |          |              |
| 211A ->220A       | 0.11563  |           |           |          |              |
| 212A ->221A       | 0.11599  |           |           |          |              |
| 213A ->219A       | -0.15960 |           |           |          |              |
| 214A ->218A       | 0.14357  |           |           |          |              |
| 215A ->219A       | -0.11374 |           |           |          |              |
| 215A ->221A       | -0.10889 |           |           |          |              |
| 216A ->218A       | 0.35346  |           |           |          |              |
| 217A ->219A       | 0.14139  |           |           |          |              |
| 217A ->221A       | 0.15307  |           |           |          |              |
| 217A ->222A       | 0.12613  |           |           |          |              |
| 217A ->225A       | 0.12875  |           |           |          |              |
| 202B ->217B       | -0.31601 |           |           |          |              |
| 204B ->217B       | 0.27837  |           |           |          |              |
| 204B ->219B       | 0.10256  |           |           |          |              |
| 208B ->217B       | 0.17867  |           |           |          |              |
| 211B ->220B       | -0.10692 |           |           |          |              |
| 212B ->221B       | -0.10547 |           |           |          |              |
| 213B ->218B       | 0.14328  |           |           |          |              |
| 214B ->219B       | 0.13238  |           |           |          |              |
| 215B ->219B       | 0.18981  |           |           |          |              |
| 215B ->221B       | -0.12601 |           |           |          |              |
| 216B ->218B       | -0.34080 |           |           |          |              |
|                   |          |           |           |          |              |
| Excited State 13: | 2.109-A  | 3.2976 eV | 375.98 nm | f=0.0037 | <S**2>=0.862 |
| 217A ->219A       | 0.21210  |           |           |          |              |
| 202B ->217B       | 0.25938  |           |           |          |              |
| 204B ->217B       | 0.10020  |           |           |          |              |
| 208B ->217B       | 0.89722  |           |           |          |              |
| 212B ->217B       | -0.12082 |           |           |          |              |
|                   |          |           |           |          |              |
| Excited State 14: | 2.069-A  | 3.3094 eV | 374.64 nm | f=0.0005 | <S**2>=0.820 |
| 203B ->217B       | -0.11839 |           |           |          |              |
| 205B ->217B       | -0.18726 |           |           |          |              |
| 207B ->217B       | -0.36111 |           |           |          |              |
| 209B ->217B       | 0.87405  |           |           |          |              |
| 210B ->217B       | 0.14167  |           |           |          |              |
| 211B ->217B       | 0.15639  |           |           |          |              |
|                   |          |           |           |          |              |
| Excited State 15: | 2.188-A  | 3.3680 eV | 368.13 nm | f=0.0715 | <S**2>=0.947 |
| 217A ->219A       | 0.46555  |           |           |          |              |
| 202B ->217B       | 0.40148  |           |           |          |              |
| 204B ->217B       | 0.51481  |           |           |          |              |
| 206B ->217B       | 0.32381  |           |           |          |              |
| 208B ->217B       | -0.34799 |           |           |          |              |

(MeOPh)<sub>3</sub>-F<sub>2</sub>PyBTM (3, Optimized ground state structure, UB3LYP/6-31G(d))

Excitation energies and oscillator strengths:

|                                                                                   |          |           |           |          |              |
|-----------------------------------------------------------------------------------|----------|-----------|-----------|----------|--------------|
| Excited State 1:                                                                  | 2.077-A  | 2.0443 eV | 606.49 nm | f=0.0511 | <S**2>=0.828 |
| 196B ->197B                                                                       | 0.97585  |           |           |          |              |
| This state for optimization and/or second-order correction.                       |          |           |           |          |              |
| Total Energy, E(TD-HF/TD-DFT) = -4282.12122900                                    |          |           |           |          |              |
| Copying the excited state density for this state as the 1-particle RhoCI density. |          |           |           |          |              |
|                                                                                   |          |           |           |          |              |
| Excited State 2:                                                                  | 2.069-A  | 2.3345 eV | 531.10 nm | f=0.0166 | <S**2>=0.821 |
| 186B ->197B                                                                       | -0.10218 |           |           |          |              |
| 193B ->197B                                                                       | -0.17205 |           |           |          |              |
| 194B ->197B                                                                       | -0.49327 |           |           |          |              |
| 195B ->197B                                                                       | 0.83272  |           |           |          |              |
|                                                                                   |          |           |           |          |              |
| Excited State 3:                                                                  | 2.075-A  | 2.3728 eV | 522.52 nm | f=0.0134 | <S**2>=0.826 |
| 186B ->197B                                                                       | 0.11802  |           |           |          |              |
| 191B ->197B                                                                       | 0.11081  |           |           |          |              |

|                   |          |           |           |          |              |  |
|-------------------|----------|-----------|-----------|----------|--------------|--|
| 193B ->197B       | 0.13314  |           |           |          |              |  |
| 194B ->197B       | 0.79971  |           |           |          |              |  |
| 195B ->197B       | 0.53524  |           |           |          |              |  |
| Excited State 4:  | 2.175-A  | 2.6773 eV | 463.09 nm | f=0.0089 | <S**2>=0.933 |  |
| 197A ->199A       | 0.19479  |           |           |          |              |  |
| 186B ->197B       | 0.13502  |           |           |          |              |  |
| 187B ->197B       | 0.15806  |           |           |          |              |  |
| 188B ->197B       | 0.13779  |           |           |          |              |  |
| 189B ->197B       | -0.14032 |           |           |          |              |  |
| 190B ->197B       | -0.18119 |           |           |          |              |  |
| 191B ->197B       | -0.39260 |           |           |          |              |  |
| 192B ->197B       | 0.58320  |           |           |          |              |  |
| 193B ->197B       | -0.48798 |           |           |          |              |  |
| 194B ->197B       | 0.15917  |           |           |          |              |  |
| Excited State 5:  | 2.117-A  | 2.7241 eV | 455.14 nm | f=0.0084 | <S**2>=0.871 |  |
| 188B ->197B       | -0.34425 |           |           |          |              |  |
| 190B ->197B       | -0.45375 |           |           |          |              |  |
| 192B ->197B       | 0.50867  |           |           |          |              |  |
| 193B ->197B       | 0.58217  |           |           |          |              |  |
| Excited State 6:  | 2.128-A  | 2.8004 eV | 442.73 nm | f=0.0068 | <S**2>=0.882 |  |
| 197A ->199A       | -0.10601 |           |           |          |              |  |
| 187B ->197B       | -0.11544 |           |           |          |              |  |
| 188B ->197B       | -0.35698 |           |           |          |              |  |
| 189B ->197B       | 0.33068  |           |           |          |              |  |
| 191B ->197B       | 0.60736  |           |           |          |              |  |
| 192B ->197B       | 0.28190  |           |           |          |              |  |
| 193B ->197B       | -0.45503 |           |           |          |              |  |
| 196B ->197B       | -0.12541 |           |           |          |              |  |
| Excited State 7:  | 2.116-A  | 2.8902 eV | 428.98 nm | f=0.0063 | <S**2>=0.869 |  |
| 197A ->199A       | 0.12935  |           |           |          |              |  |
| 186B ->197B       | 0.14787  |           |           |          |              |  |
| 188B ->197B       | 0.66006  |           |           |          |              |  |
| 189B ->197B       | 0.27850  |           |           |          |              |  |
| 190B ->197B       | 0.22452  |           |           |          |              |  |
| 191B ->197B       | 0.29045  |           |           |          |              |  |
| 192B ->197B       | 0.35426  |           |           |          |              |  |
| 193B ->197B       | 0.30724  |           |           |          |              |  |
| 194B ->197B       | -0.19157 |           |           |          |              |  |
| Excited State 8:  | 2.281-A  | 2.9488 eV | 420.46 nm | f=0.0051 | <S**2>=1.051 |  |
| 197A ->198A       | 0.36340  |           |           |          |              |  |
| 197A ->199A       | 0.13932  |           |           |          |              |  |
| 184B ->197B       | -0.12703 |           |           |          |              |  |
| 185B ->197B       | -0.13698 |           |           |          |              |  |
| 186B ->197B       | 0.70312  |           |           |          |              |  |
| 187B ->197B       | 0.15961  |           |           |          |              |  |
| 188B ->197B       | -0.23316 |           |           |          |              |  |
| 191B ->197B       | -0.14750 |           |           |          |              |  |
| 192B ->197B       | -0.17665 |           |           |          |              |  |
| 193B ->197B       | 0.13822  |           |           |          |              |  |
| 194B ->197B       | -0.18280 |           |           |          |              |  |
| 196B ->197B       | -0.10012 |           |           |          |              |  |
| Excited State 9:  | 2.403-A  | 3.0283 eV | 409.42 nm | f=0.0072 | <S**2>=1.193 |  |
| 197A ->198A       | 0.32542  |           |           |          |              |  |
| 197A ->199A       | -0.10878 |           |           |          |              |  |
| 185B ->197B       | 0.83748  |           |           |          |              |  |
| 185B ->199B       | 0.15367  |           |           |          |              |  |
| 196B ->198B       | 0.11116  |           |           |          |              |  |
| Excited State 10: | 2.718-A  | 3.2084 eV | 386.43 nm | f=0.0804 | <S**2>=1.597 |  |
| 193A ->201A       | 0.10136  |           |           |          |              |  |
| 194A ->198A       | 0.14872  |           |           |          |              |  |
| 196A ->198A       | 0.15655  |           |           |          |              |  |
| 197A ->198A       | -0.35257 |           |           |          |              |  |
| 197A ->199A       | 0.38290  |           |           |          |              |  |
| 184B ->197B       | -0.25689 |           |           |          |              |  |
| 185B ->197B       | 0.30902  |           |           |          |              |  |
| 186B ->197B       | 0.19454  |           |           |          |              |  |
| 187B ->197B       | 0.11675  |           |           |          |              |  |
| 190B ->197B       | -0.21410 |           |           |          |              |  |
| 191B ->197B       | 0.27752  |           |           |          |              |  |
| 192B ->197B       | -0.19859 |           |           |          |              |  |

|                   |          |           |           |          |              |
|-------------------|----------|-----------|-----------|----------|--------------|
| 194B ->198B       | -0.13606 |           |           |          |              |
| 196B ->198B       | -0.26401 |           |           |          |              |
| Excited State 11: | 2.176-A  | 3.2171 eV | 385.39 nm | f=0.0080 | <S**2>=0.933 |
| 197A ->198A       | -0.17368 |           |           |          |              |
| 185B ->197B       | 0.18139  |           |           |          |              |
| 186B ->197B       | 0.10824  |           |           |          |              |
| 188B ->197B       | -0.38713 |           |           |          |              |
| 189B ->197B       | 0.11591  |           |           |          |              |
| 190B ->197B       | 0.74164  |           |           |          |              |
| 191B ->197B       | -0.25729 |           |           |          |              |
| 192B ->197B       | 0.25547  |           |           |          |              |
| 193B ->197B       | 0.14415  |           |           |          |              |
| 196B ->198B       | -0.10659 |           |           |          |              |
| Excited State 12: | 2.094-A  | 3.2573 eV | 380.64 nm | f=0.0068 | <S**2>=0.846 |
| 197A ->198A       | -0.15883 |           |           |          |              |
| 197A ->199A       | -0.11133 |           |           |          |              |
| 184B ->197B       | 0.13121  |           |           |          |              |
| 189B ->197B       | 0.81696  |           |           |          |              |
| 190B ->197B       | -0.28665 |           |           |          |              |
| 191B ->197B       | -0.38327 |           |           |          |              |
| Excited State 13: | 2.204-A  | 3.3174 eV | 373.74 nm | f=0.0477 | <S**2>=0.964 |
| 197A ->198A       | -0.34178 |           |           |          |              |
| 197A ->199A       | -0.29678 |           |           |          |              |
| 184B ->197B       | 0.52195  |           |           |          |              |
| 185B ->197B       | 0.11767  |           |           |          |              |
| 186B ->197B       | 0.35770  |           |           |          |              |
| 187B ->197B       | 0.39509  |           |           |          |              |
| 189B ->197B       | -0.14279 |           |           |          |              |
| 191B ->197B       | 0.17342  |           |           |          |              |
| Excited State 14: | 2.089-A  | 3.3723 eV | 367.66 nm | f=0.0031 | <S**2>=0.841 |
| 197A ->198A       | 0.10840  |           |           |          |              |
| 184B ->197B       | -0.11652 |           |           |          |              |
| 185B ->197B       | -0.12770 |           |           |          |              |
| 186B ->197B       | -0.37260 |           |           |          |              |
| 187B ->197B       | 0.84930  |           |           |          |              |
| 188B ->197B       | -0.11985 |           |           |          |              |
| 189B ->197B       | 0.21289  |           |           |          |              |
| Excited State 15: | 2.840-A  | 3.4135 eV | 363.22 nm | f=0.0985 | <S**2>=1.766 |
| 189A ->200A       | -0.11674 |           |           |          |              |
| 190A ->200A       | 0.10030  |           |           |          |              |
| 191A ->200A       | -0.16628 |           |           |          |              |
| 192A ->199A       | 0.10397  |           |           |          |              |
| 194A ->198A       | -0.11715 |           |           |          |              |
| 196A ->198A       | -0.21381 |           |           |          |              |
| 196A ->199A       | 0.20017  |           |           |          |              |
| 197A ->198A       | -0.11200 |           |           |          |              |
| 197A ->199A       | 0.48559  |           |           |          |              |
| 197A ->201A       | -0.12549 |           |           |          |              |
| 197A ->207A       | 0.10743  |           |           |          |              |
| 184B ->197B       | 0.21859  |           |           |          |              |
| 186B ->197B       | -0.16482 |           |           |          |              |
| 187B ->197B       | -0.15034 |           |           |          |              |
| 188B ->197B       | -0.17100 |           |           |          |              |
| 189B ->197B       | 0.10716  |           |           |          |              |
| 191B ->197B       | 0.10572  |           |           |          |              |
| 191B ->199B       | 0.13202  |           |           |          |              |
| 191B ->200B       | 0.11893  |           |           |          |              |
| 192B ->197B       | -0.10320 |           |           |          |              |
| 192B ->200B       | 0.13380  |           |           |          |              |
| 196B ->198B       | 0.20377  |           |           |          |              |

**Ph<sub>4</sub>-F<sub>2</sub>PyBTM (1, Optimized first doublet excited state structure, UB3LYP/6-31G(d))**

Excitation energies and oscillator strengths:

|                  |         |           |           |          |              |
|------------------|---------|-----------|-----------|----------|--------------|
| Excited State 1: | 2.092-A | 1.8528 eV | 669.16 nm | f=0.0318 | <S**2>=0.844 |
| 185A ->186A      | 0.11112 |           |           |          |              |
| 174B ->185B      | 0.10441 |           |           |          |              |
| 184B ->185B      | 0.96744 |           |           |          |              |

This state for optimization and/or second-order correction.  
 Total Energy, E(TD-HF/TD-DFT) = -3710.00985630  
 Copying the excited state density for this state as the 1-particle RhoCI density.

Excited State 2: 2.104-A 2.2579 eV 549.11 nm f=0.0482 <S\*\*2>=0.857  
 185A ->187A -0.11332  
 173B ->185B 0.13255  
 179B ->185B -0.18154  
 182B ->185B 0.10109  
 183B ->185B 0.92507

Excited State 3: 2.110-A 2.3915 eV 518.44 nm f=0.0240 <S\*\*2>=0.863  
 185A ->186A 0.11031  
 173B ->185B 0.10449  
 175B ->185B 0.10988  
 180B ->185B 0.18618  
 181B ->185B 0.36602  
 182B ->185B 0.84580  
 183B ->185B -0.10173

Excited State 4: 2.130-A 2.5072 eV 494.51 nm f=0.0205 <S\*\*2>=0.885  
 185A ->187A -0.18284  
 172B ->185B -0.19784  
 178B ->185B 0.19931  
 180B ->185B -0.13025  
 181B ->185B 0.84044  
 182B ->185B -0.29935

Excited State 5: 2.099-A 2.5789 eV 480.76 nm f=0.0067 <S\*\*2>=0.851  
 176B ->185B 0.22659  
 177B ->185B 0.60609  
 178B ->185B 0.63434  
 179B ->185B 0.27824  
 180B ->185B -0.10283  
 181B ->185B -0.11976  
 183B ->185B 0.10751

Excited State 6: 2.671-A 2.7889 eV 444.56 nm f=0.0289 <S\*\*2>=1.534  
 184A ->186A -0.26714  
 184A ->188A 0.17622  
 185A ->186A 0.40284  
 185A ->187A 0.12360  
 174B ->185B 0.28245  
 175B ->185B 0.15314  
 176B ->185B 0.19177  
 179B ->185B 0.19248  
 180B ->185B 0.36443  
 181B ->185B 0.11045  
 182B ->185B -0.34470  
 184B ->185B -0.20837  
 184B ->186B -0.30386  
 184B ->188B 0.13945

Excited State 7: 2.356-A 2.8697 eV 432.05 nm f=0.0065 <S\*\*2>=1.138  
 184A ->186A 0.13986  
 185A ->186A -0.21083  
 171B ->185B 0.54716  
 171B ->187B 0.11739  
 172B ->185B -0.16279  
 173B ->185B 0.38907  
 174B ->185B 0.48787  
 180B ->185B 0.26520  
 184B ->186B 0.18044

Excited State 8: 2.383-A 2.8831 eV 430.03 nm f=0.0226 <S\*\*2>=1.169  
 184A ->186A 0.16453  
 185A ->186A -0.29119  
 185A ->187A 0.13496  
 172B ->185B 0.18551  
 173B ->185B -0.18398  
 174B ->185B -0.10611  
 175B ->185B 0.30213  
 176B ->185B 0.15945  
 177B ->185B -0.30996  
 179B ->185B 0.55637  
 180B ->185B 0.17780  
 183B ->185B 0.27397

|                   |          |           |           |          |              |
|-------------------|----------|-----------|-----------|----------|--------------|
| 184B ->186B       | 0.22058  |           |           |          |              |
| Excited State 9:  | 2.178-A  | 2.9603 eV | 418.82 nm | f=0.0095 | <S**2>=0.936 |
| 184A ->186A       | 0.12026  |           |           |          |              |
| 171B ->185B       | -0.29717 |           |           |          |              |
| 172B ->185B       | 0.13270  |           |           |          |              |
| 174B ->185B       | -0.14293 |           |           |          |              |
| 176B ->185B       | -0.19835 |           |           |          |              |
| 177B ->185B       | 0.29511  |           |           |          |              |
| 179B ->185B       | -0.25886 |           |           |          |              |
| 180B ->185B       | 0.75399  |           |           |          |              |
| 182B ->185B       | -0.11847 |           |           |          |              |
| 184B ->186B       | 0.12823  |           |           |          |              |
| Excited State 10: | 2.072-A  | 3.0148 eV | 411.25 nm | f=0.0019 | <S**2>=0.823 |
| 185A ->187A       | -0.15582 |           |           |          |              |
| 177B ->185B       | -0.59957 |           |           |          |              |
| 178B ->185B       | 0.65014  |           |           |          |              |
| 179B ->185B       | -0.24199 |           |           |          |              |
| 180B ->185B       | 0.15128  |           |           |          |              |
| 181B ->185B       | -0.25646 |           |           |          |              |
| Excited State 11: | 2.221-A  | 3.0697 eV | 403.90 nm | f=0.0028 | <S**2>=0.983 |
| 184A ->186A       | 0.12898  |           |           |          |              |
| 171B ->185B       | -0.29348 |           |           |          |              |
| 172B ->185B       | 0.16679  |           |           |          |              |
| 173B ->185B       | -0.14594 |           |           |          |              |
| 174B ->185B       | 0.32452  |           |           |          |              |
| 176B ->185B       | 0.68965  |           |           |          |              |
| 178B ->185B       | -0.13851 |           |           |          |              |
| 179B ->185B       | -0.35971 |           |           |          |              |
| 180B ->185B       | -0.10716 |           |           |          |              |
| 184B ->186B       | 0.14904  |           |           |          |              |
| Excited State 12: | 2.162-A  | 3.1180 eV | 397.64 nm | f=0.0213 | <S**2>=0.919 |
| 185A ->187A       | -0.40756 |           |           |          |              |
| 185A ->190A       | -0.10110 |           |           |          |              |
| 170B ->185B       | 0.23185  |           |           |          |              |
| 171B ->185B       | -0.17043 |           |           |          |              |
| 172B ->185B       | -0.27178 |           |           |          |              |
| 173B ->185B       | 0.11273  |           |           |          |              |
| 175B ->185B       | -0.40749 |           |           |          |              |
| 176B ->185B       | 0.23045  |           |           |          |              |
| 178B ->185B       | -0.25401 |           |           |          |              |
| 179B ->185B       | 0.45728  |           |           |          |              |
| 180B ->185B       | 0.20806  |           |           |          |              |
| 181B ->185B       | -0.11484 |           |           |          |              |
| Excited State 13: | 2.483-A  | 3.1649 eV | 391.75 nm | f=0.0545 | <S**2>=1.291 |
| 183A ->187A       | -0.10969 |           |           |          |              |
| 184A ->186A       | -0.24449 |           |           |          |              |
| 185A ->186A       | -0.31978 |           |           |          |              |
| 185A ->187A       | 0.14265  |           |           |          |              |
| 185A ->188A       | -0.15967 |           |           |          |              |
| 170B ->185B       | 0.16280  |           |           |          |              |
| 171B ->185B       | 0.21317  |           |           |          |              |
| 172B ->185B       | -0.20972 |           |           |          |              |
| 174B ->185B       | -0.37724 |           |           |          |              |
| 176B ->185B       | 0.45343  |           |           |          |              |
| 179B ->185B       | -0.21422 |           |           |          |              |
| 180B ->185B       | 0.17266  |           |           |          |              |
| 183B ->185B       | 0.11337  |           |           |          |              |
| 183B ->187B       | 0.12314  |           |           |          |              |
| 184B ->186B       | -0.18352 |           |           |          |              |
| Excited State 14: | 2.466-A  | 3.2163 eV | 385.49 nm | f=0.0828 | <S**2>=1.270 |
| 183A ->187A       | 0.10949  |           |           |          |              |
| 184A ->186A       | 0.18645  |           |           |          |              |
| 185A ->186A       | 0.44946  |           |           |          |              |
| 185A ->187A       | -0.16829 |           |           |          |              |
| 185A ->188A       | 0.16113  |           |           |          |              |
| 171B ->185B       | 0.43690  |           |           |          |              |
| 173B ->185B       | -0.11015 |           |           |          |              |
| 174B ->185B       | -0.42158 |           |           |          |              |
| 175B ->185B       | 0.21417  |           |           |          |              |
| 176B ->185B       | 0.21347  |           |           |          |              |
| 183B ->187B       | -0.13494 |           |           |          |              |

184B ->188B -0.11909

Excited State 15: 2.127-A 3.2385 eV 382.85 nm f=0.0267 <S\*\*2>=0.881

185A ->186A -0.10365

185A ->187A -0.32746

170B ->185B 0.25952

171B ->185B -0.18995

172B ->185B -0.10412

173B ->185B 0.23110

175B ->185B 0.76727

177B ->185B 0.17449

**(MeOPh)<sub>4</sub>-F<sub>2</sub>PyBTM (2, Optimized first doublet excited state structure, UB3LYP/6-31G(d))**

Excitation energies and oscillator strengths:

Excited State 1: 2.062-A 1.5703 eV 789.57 nm f=0.0375 <S\*\*2>=0.813

216B ->217B 0.98390

This state for optimization and/or second-order correction.

Total Energy, E(TD-HF/TD-DFT) = -4168.11366658

Copying the excited state density for this state as the 1-particle RhoCI density.

Excited State 2: 2.069-A 1.9662 eV 630.57 nm f=0.0540 <S\*\*2>=0.820

212B ->217B 0.12372

215B ->217B 0.97040

Excited State 3: 2.080-A 2.1879 eV 566.68 nm f=0.0430 <S\*\*2>=0.832

209B ->217B -0.15581

211B ->217B 0.15048

213B ->217B -0.15713

214B ->217B 0.93302

Excited State 4: 2.079-A 2.2829 eV 543.11 nm f=0.0258 <S\*\*2>=0.830

204B ->217B 0.18064

209B ->217B 0.11137

211B ->217B -0.11651

212B ->217B -0.13340

213B ->217B 0.92580

214B ->217B 0.17996

Excited State 5: 2.108-A 2.5680 eV 482.80 nm f=0.0070 <S\*\*2>=0.861

207B ->217B -0.15487

208B ->217B 0.27929

209B ->217B 0.56970

210B ->217B -0.26776

211B ->217B 0.66077

Excited State 6: 2.161-A 2.6002 eV 476.83 nm f=0.0021 <S\*\*2>=0.917

217A ->218A 0.11410

217A ->219A -0.13409

204B ->217B 0.15145

208B ->217B 0.11036

210B ->217B 0.13367

212B ->217B 0.88341

215B ->217B -0.13579

216B ->217B -0.11070

Excited State 7: 2.551-A 2.7442 eV 451.80 nm f=0.0030 <S\*\*2>=1.377

216A ->218A 0.10764

216A ->220A 0.13191

217A ->218A -0.36648

217A ->219A 0.14006

205B ->217B -0.17829

206B ->217B 0.22980

207B ->217B 0.51568

208B ->217B -0.23936

209B ->217B -0.18767

210B ->217B 0.11049

211B ->217B 0.30986

212B ->217B 0.21332

216B ->218B -0.23158

216B ->219B 0.10971

216B ->220B -0.12557

Excited State 8: 2.161-A 2.7686 eV 447.82 nm f=0.0119 <S\*\*2>=0.918

|             |          |
|-------------|----------|
| 217A ->218A | -0.16737 |
| 203B ->217B | 0.10393  |
| 204B ->217B | 0.18778  |
| 206B ->217B | 0.11597  |
| 207B ->217B | 0.16366  |
| 209B ->217B | 0.63309  |
| 210B ->217B | 0.16822  |
| 211B ->217B | -0.51400 |
| 212B ->217B | 0.10653  |
| 213B ->217B | -0.23893 |
| 214B ->217B | 0.19103  |

Excited State 9: 2.460-A 2.8526 eV 434.64 nm f=0.0062 <S\*\*2>=1.263

|             |          |
|-------------|----------|
| 216A ->218A | -0.16035 |
| 216A ->220A | -0.11843 |
| 217A ->218A | 0.15290  |
| 217A ->219A | -0.28344 |
| 203B ->217B | 0.24075  |
| 204B ->217B | 0.48358  |
| 207B ->217B | 0.37195  |
| 210B ->217B | 0.19746  |
| 211B ->217B | 0.29783  |
| 212B ->217B | -0.26401 |
| 213B ->217B | -0.14290 |
| 214B ->217B | -0.12945 |
| 216B ->218B | 0.21896  |
| 216B ->220B | 0.12460  |

Excited State 10: 2.511-A 2.8991 eV 427.67 nm f=0.0207 <S\*\*2>=1.327

|             |          |
|-------------|----------|
| 216A ->219A | -0.19174 |
| 217A ->218A | -0.32234 |
| 217A ->219A | -0.16582 |
| 202B ->217B | -0.12412 |
| 203B ->217B | -0.38112 |
| 204B ->217B | 0.38623  |
| 205B ->217B | 0.27939  |
| 206B ->217B | -0.27591 |
| 207B ->217B | -0.21881 |
| 208B ->217B | 0.14153  |
| 209B ->217B | -0.14507 |
| 210B ->217B | 0.13125  |
| 212B ->217B | -0.13259 |
| 213B ->217B | -0.11136 |
| 214B ->217B | -0.10288 |
| 216B ->218B | -0.21464 |
| 216B ->219B | 0.13228  |
| 216B ->220B | -0.11615 |

Excited State 11: 2.418-A 3.0077 eV 412.23 nm f=0.0043 <S\*\*2>=1.211

|             |          |
|-------------|----------|
| 216A ->218A | 0.19193  |
| 217A ->220A | -0.11190 |
| 203B ->217B | 0.77889  |
| 203B ->219B | 0.13992  |
| 204B ->217B | 0.17702  |
| 206B ->217B | -0.10306 |
| 207B ->217B | -0.16511 |
| 208B ->217B | 0.17069  |
| 209B ->217B | -0.19565 |
| 210B ->217B | -0.12976 |
| 216B ->218B | -0.18998 |
| 216B ->220B | -0.10703 |

Excited State 12: 2.112-A 3.0701 eV 403.85 nm f=0.0066 <S\*\*2>=0.866

|             |          |
|-------------|----------|
| 217A ->219A | 0.17681  |
| 204B ->217B | -0.17921 |
| 207B ->217B | -0.17809 |
| 208B ->217B | 0.16870  |
| 210B ->217B | 0.87351  |
| 211B ->217B | 0.18006  |

Excited State 13: 2.073-A 3.1241 eV 396.87 nm f=0.0013 <S\*\*2>=0.825

|             |          |
|-------------|----------|
| 206B ->217B | 0.17124  |
| 207B ->217B | 0.31378  |
| 208B ->217B | 0.86200  |
| 209B ->217B | -0.24739 |



Excited State 14: 2.806-A 3.1736 eV 390.67 nm f=0.1385 <S\*\*2>=1.718

|             |          |
|-------------|----------|
| 213A ->219A | -0.10819 |
| 215A ->219A | -0.13481 |
| 216A ->218A | 0.34397  |
| 217A ->218A | 0.47473  |
| 217A ->220A | -0.23095 |
| 202B ->217B | -0.15463 |
| 203B ->217B | -0.25163 |
| 204B ->217B | 0.19458  |
| 207B ->217B | 0.27052  |
| 209B ->217B | 0.11157  |
| 213B ->219B | 0.10673  |
| 215B ->218B | 0.17196  |
| 215B ->219B | 0.16484  |
| 216B ->218B | -0.10686 |
| 216B ->220B | -0.12263 |

Excited State 15: 2.777-A 3.2635 eV 379.91 nm f=0.0650 <S\*\*2>=1.678

|             |          |
|-------------|----------|
| 214A ->218A | 0.14193  |
| 215A ->218A | -0.13628 |
| 216A ->219A | 0.11748  |
| 216A ->220A | -0.18917 |
| 217A ->218A | -0.14483 |
| 217A ->219A | 0.43763  |
| 217A ->220A | 0.23016  |
| 202B ->217B | 0.16153  |
| 204B ->217B | 0.15722  |
| 205B ->217B | 0.22958  |
| 206B ->217B | -0.40899 |
| 207B ->217B | 0.22730  |
| 214B ->218B | -0.16659 |
| 215B ->218B | 0.10078  |
| 216B ->220B | 0.27422  |

**(MeOPh)<sub>2</sub>-F<sub>2</sub>PyBTM (3, Optimized first doublet excited state structure, UB3LYP/6-31G(d))**

Excitation energies and oscillator strengths:

Excited State 1: 2.058-A 1.4964 eV 828.55 nm f=0.0323 <S\*\*2>=0.809

|             |          |
|-------------|----------|
| 193B ->197B | -0.10654 |
| 196B ->197B | 0.98564  |

This state for optimization and/or second-order correction.

Total Energy, E(TD-HF/TD-DFT) = -4282.13178412

Copying the excited state density for this state as the 1-particle RhoCI density.

Excited State 2: 2.071-A 2.1077 eV 588.24 nm f=0.0444 <S\*\*2>=0.822

|             |          |
|-------------|----------|
| 186B ->197B | -0.15027 |
| 189B ->197B | 0.10220  |
| 193B ->197B | 0.10854  |
| 194B ->197B | 0.63702  |
| 195B ->197B | 0.71799  |

Excited State 3: 2.052-A 2.1927 eV 565.44 nm f=0.0054 <S\*\*2>=0.803

|             |          |
|-------------|----------|
| 194B ->197B | 0.72778  |
| 195B ->197B | -0.67638 |

Excited State 4: 2.124-A 2.5044 eV 495.06 nm f=0.0082 <S\*\*2>=0.877

|             |          |
|-------------|----------|
| 196A ->199A | -0.10971 |
| 197A ->199A | -0.11466 |
| 186B ->197B | -0.13426 |
| 187B ->197B | -0.10601 |
| 189B ->197B | -0.21419 |
| 190B ->197B | -0.49541 |
| 191B ->197B | 0.29323  |
| 192B ->197B | 0.70152  |

Excited State 5: 2.129-A 2.5406 eV 488.00 nm f=0.0138 <S\*\*2>=0.883

|             |          |
|-------------|----------|
| 196A ->199A | 0.10375  |
| 197A ->198A | -0.10151 |
| 186B ->197B | 0.17409  |
| 187B ->197B | 0.10234  |
| 188B ->197B | -0.37024 |
| 190B ->197B | -0.23691 |
| 191B ->197B | 0.29973  |

|                   |          |           |           |          |              |  |
|-------------------|----------|-----------|-----------|----------|--------------|--|
| 192B ->197B       | -0.18123 |           |           |          |              |  |
| 193B ->197B       | 0.73746  |           |           |          |              |  |
| 196B ->197B       | 0.10478  |           |           |          |              |  |
| Excited State 6:  | 2.184-A  | 2.6149 eV | 474.14 nm | f=0.0105 | <S**2>=0.943 |  |
| 197A ->198A       | 0.17517  |           |           |          |              |  |
| 187B ->197B       | 0.15726  |           |           |          |              |  |
| 188B ->197B       | -0.26526 |           |           |          |              |  |
| 189B ->197B       | 0.40865  |           |           |          |              |  |
| 190B ->197B       | 0.33336  |           |           |          |              |  |
| 191B ->197B       | 0.65972  |           |           |          |              |  |
| 192B ->197B       | 0.10064  |           |           |          |              |  |
| 193B ->197B       | -0.20706 |           |           |          |              |  |
| 194B ->197B       | -0.10956 |           |           |          |              |  |
| Excited State 7:  | 2.232-A  | 2.7303 eV | 454.10 nm | f=0.0012 | <S**2>=0.995 |  |
| 197A ->198A       | -0.22647 |           |           |          |              |  |
| 186B ->197B       | 0.27009  |           |           |          |              |  |
| 188B ->197B       | 0.70010  |           |           |          |              |  |
| 189B ->197B       | 0.20016  |           |           |          |              |  |
| 190B ->197B       | 0.20541  |           |           |          |              |  |
| 191B ->197B       | 0.27813  |           |           |          |              |  |
| 192B ->197B       | 0.24700  |           |           |          |              |  |
| 193B ->197B       | 0.27853  |           |           |          |              |  |
| 196B ->198B       | -0.13665 |           |           |          |              |  |
| Excited State 8:  | 2.437-A  | 2.7755 eV | 446.71 nm | f=0.0109 | <S**2>=1.235 |  |
| 196A ->199A       | 0.14248  |           |           |          |              |  |
| 196A ->201A       | 0.10725  |           |           |          |              |  |
| 197A ->198A       | -0.31212 |           |           |          |              |  |
| 197A ->199A       | 0.12191  |           |           |          |              |  |
| 186B ->197B       | 0.57491  |           |           |          |              |  |
| 187B ->197B       | 0.13937  |           |           |          |              |  |
| 188B ->197B       | -0.19469 |           |           |          |              |  |
| 189B ->197B       | -0.10211 |           |           |          |              |  |
| 193B ->197B       | -0.48237 |           |           |          |              |  |
| 194B ->197B       | 0.17601  |           |           |          |              |  |
| 195B ->197B       | 0.12212  |           |           |          |              |  |
| 196B ->198B       | -0.21965 |           |           |          |              |  |
| 196B ->201B       | -0.11333 |           |           |          |              |  |
| Excited State 9:  | 2.725-A  | 2.8724 eV | 431.64 nm | f=0.0133 | <S**2>=1.606 |  |
| 196A ->198A       | -0.11272 |           |           |          |              |  |
| 196A ->201A       | -0.10159 |           |           |          |              |  |
| 197A ->198A       | 0.35958  |           |           |          |              |  |
| 197A ->199A       | 0.11634  |           |           |          |              |  |
| 197A ->201A       | 0.12309  |           |           |          |              |  |
| 185B ->197B       | 0.55071  |           |           |          |              |  |
| 185B ->199B       | 0.11751  |           |           |          |              |  |
| 186B ->197B       | 0.42398  |           |           |          |              |  |
| 188B ->197B       | 0.15467  |           |           |          |              |  |
| 189B ->197B       | -0.11899 |           |           |          |              |  |
| 190B ->197B       | -0.10984 |           |           |          |              |  |
| 196B ->198B       | 0.31851  |           |           |          |              |  |
| 196B ->200B       | -0.10380 |           |           |          |              |  |
| 196B ->201B       | 0.14702  |           |           |          |              |  |
| Excited State 10: | 2.447-A  | 2.9670 eV | 417.87 nm | f=0.0138 | <S**2>=1.247 |  |
| 196A ->198A       | 0.14781  |           |           |          |              |  |
| 197A ->198A       | -0.17102 |           |           |          |              |  |
| 197A ->201A       | -0.11415 |           |           |          |              |  |
| 185B ->197B       | 0.71641  |           |           |          |              |  |
| 185B ->199B       | 0.13169  |           |           |          |              |  |
| 186B ->197B       | -0.35238 |           |           |          |              |  |
| 187B ->197B       | -0.11861 |           |           |          |              |  |
| 191B ->197B       | 0.16489  |           |           |          |              |  |
| 192B ->197B       | -0.23328 |           |           |          |              |  |
| 196B ->198B       | -0.23261 |           |           |          |              |  |
| 196B ->201B       | -0.11285 |           |           |          |              |  |
| Excited State 11: | 2.093-A  | 2.9876 eV | 415.00 nm | f=0.0006 | <S**2>=0.845 |  |
| 185B ->197B       | 0.26909  |           |           |          |              |  |
| 187B ->197B       | 0.15250  |           |           |          |              |  |
| 188B ->197B       | -0.32236 |           |           |          |              |  |
| 190B ->197B       | 0.47755  |           |           |          |              |  |
| 191B ->197B       | -0.40985 |           |           |          |              |  |
| 192B ->197B       | 0.55813  |           |           |          |              |  |

|                   |          |           |           |          |              |
|-------------------|----------|-----------|-----------|----------|--------------|
| 193B ->197B       | 0.20905  |           |           |          |              |
| Excited State 12: | 2.057-A  | 3.0678 eV | 404.15 nm | f=0.0002 | <S**2>=0.808 |
| 189B ->197B       | 0.80743  |           |           |          |              |
| 190B ->197B       | -0.49471 |           |           |          |              |
| 191B ->197B       | -0.27612 |           |           |          |              |
| Excited State 13: | 2.070-A  | 3.2226 eV | 384.73 nm | f=0.0019 | <S**2>=0.821 |
| 197A ->199A       | 0.11520  |           |           |          |              |
| 184B ->197B       | 0.13104  |           |           |          |              |
| 186B ->197B       | -0.27406 |           |           |          |              |
| 187B ->197B       | 0.86956  |           |           |          |              |
| 188B ->197B       | 0.26289  |           |           |          |              |
| 189B ->197B       | -0.14535 |           |           |          |              |
| 190B ->197B       | -0.13021 |           |           |          |              |
| Excited State 14: | 2.937-A  | 3.2505 eV | 381.43 nm | f=0.0718 | <S**2>=1.906 |
| 194A ->198A       | -0.13661 |           |           |          |              |
| 196A ->198A       | 0.28578  |           |           |          |              |
| 196A ->201A       | 0.10021  |           |           |          |              |
| 197A ->198A       | 0.42600  |           |           |          |              |
| 197A ->199A       | -0.18249 |           |           |          |              |
| 197A ->200A       | 0.28243  |           |           |          |              |
| 197A ->201A       | -0.24851 |           |           |          |              |
| 184B ->197B       | -0.27470 |           |           |          |              |
| 186B ->197B       | 0.14964  |           |           |          |              |
| 187B ->197B       | 0.16299  |           |           |          |              |
| 194B ->198B       | 0.17831  |           |           |          |              |
| 195B ->198B       | 0.11928  |           |           |          |              |
| 196B ->200B       | 0.23768  |           |           |          |              |
| 196B ->201B       | -0.22378 |           |           |          |              |
| 196B ->209B       | -0.11761 |           |           |          |              |
| Excited State 15: | 2.446-A  | 3.2885 eV | 377.02 nm | f=0.0607 | <S**2>=1.246 |
| 194A ->198A       | -0.13121 |           |           |          |              |
| 196A ->199A       | 0.34625  |           |           |          |              |
| 196A ->201A       | 0.10173  |           |           |          |              |
| 197A ->199A       | 0.40021  |           |           |          |              |
| 197A ->200A       | 0.13796  |           |           |          |              |
| 197A ->201A       | -0.11829 |           |           |          |              |
| 197A ->206A       | -0.10518 |           |           |          |              |
| 172B ->197B       | -0.10555 |           |           |          |              |
| 184B ->197B       | 0.49841  |           |           |          |              |
| 186B ->197B       | -0.23193 |           |           |          |              |
| 187B ->197B       | -0.28159 |           |           |          |              |
| 196B ->200B       | 0.14022  |           |           |          |              |
| 196B ->201B       | -0.13299 |           |           |          |              |

$^1\text{H}$  NMR (400 MHz,  $\text{CDCl}_3$ ) spectrum of  $\alpha\text{H-Ph}_4\text{-F}_2\text{PyBTM}$  (**1H**)

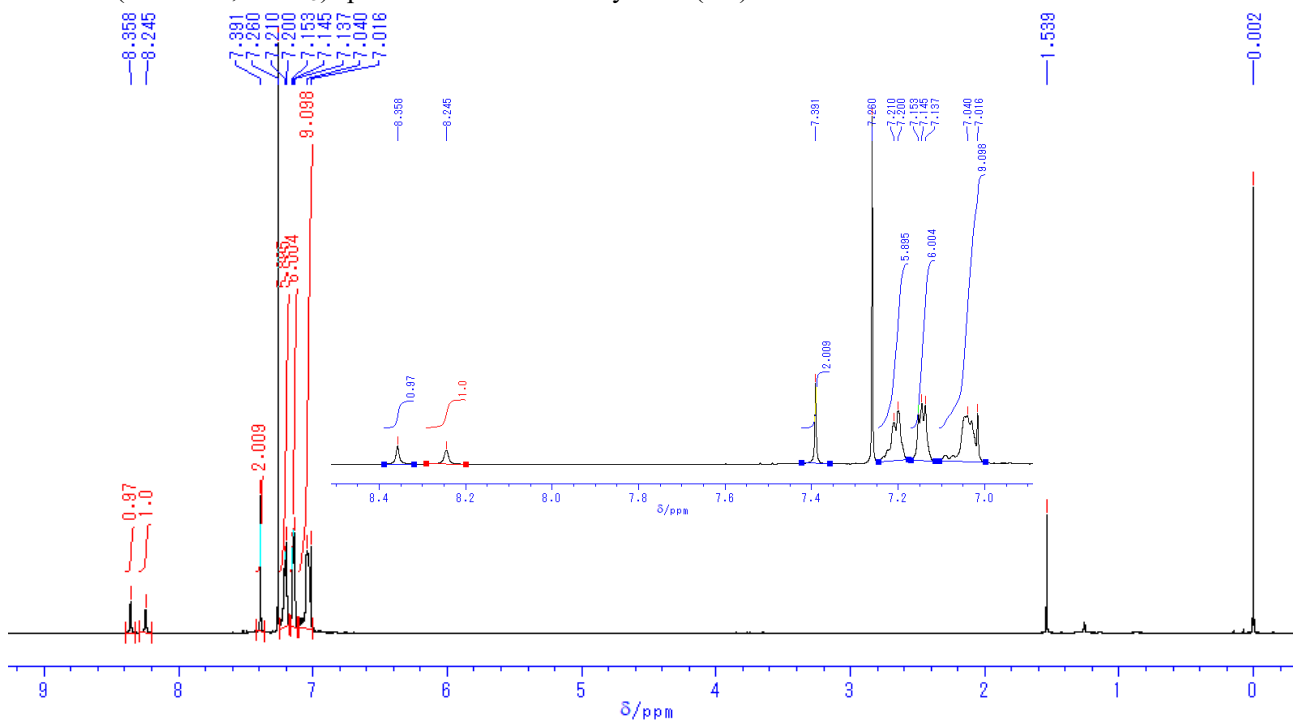

$^{13}\text{C}$  NMR (100 MHz,  $\text{CDCl}_3$ ) spectrum of  $\alpha\text{H-Ph}_4\text{-F}_2\text{PyBTM}$  (**1H**)

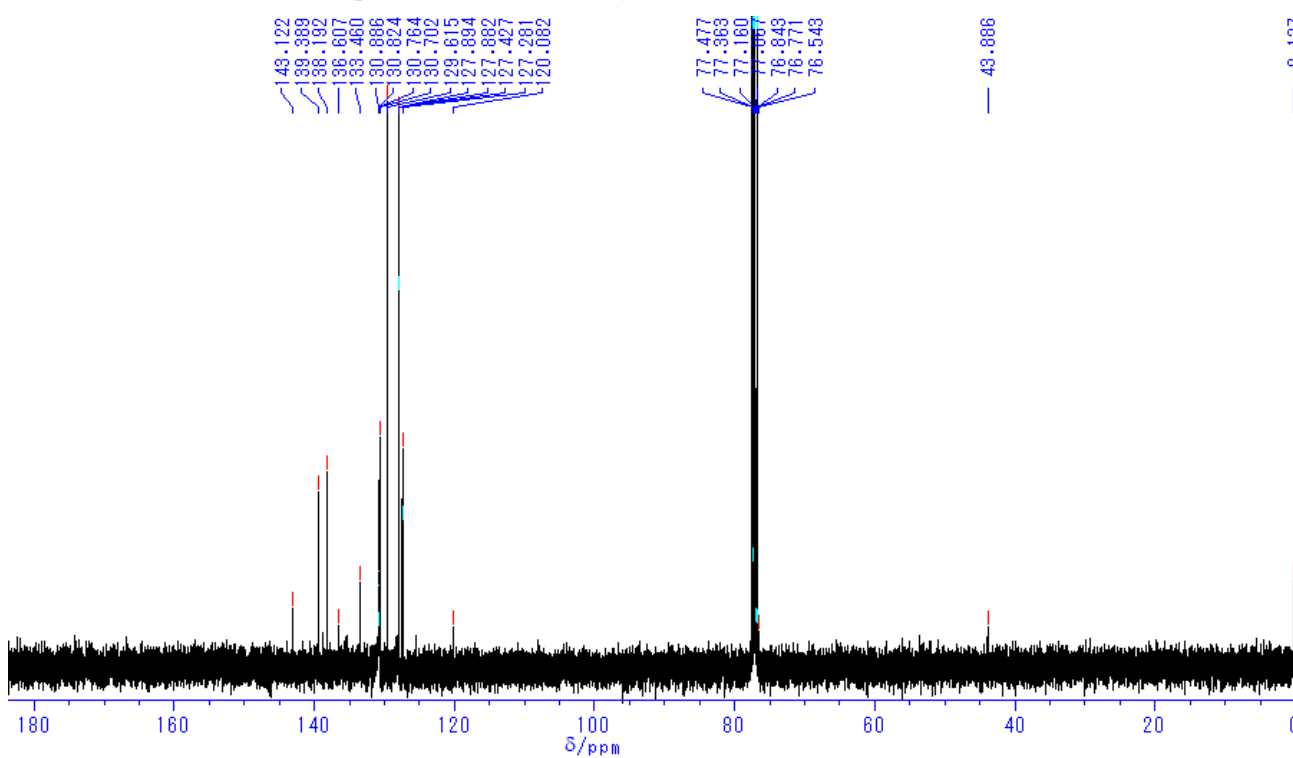

$^1\text{H}$  NMR (400 MHz,  $\text{CDCl}_3$ ) spectrum of  $\alpha\text{H}-(\text{MeOPh})_4\text{-F}_2\text{PyBTM}$  (**2H**)

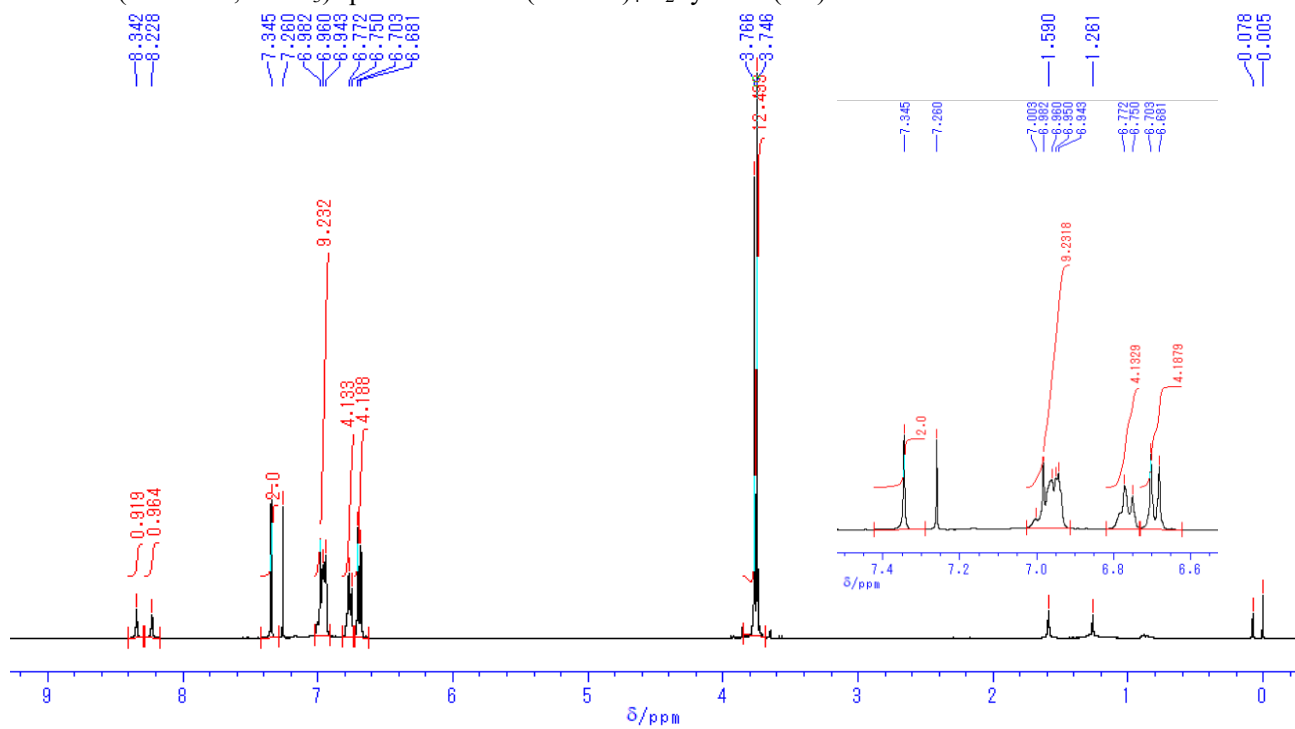

$^{13}\text{C}$  NMR (100 MHz,  $\text{CDCl}_3$ ) spectrum of  $\alpha\text{H}-(\text{MeOPh})_4\text{-F}_2\text{PyBTM}$  (**2H**)

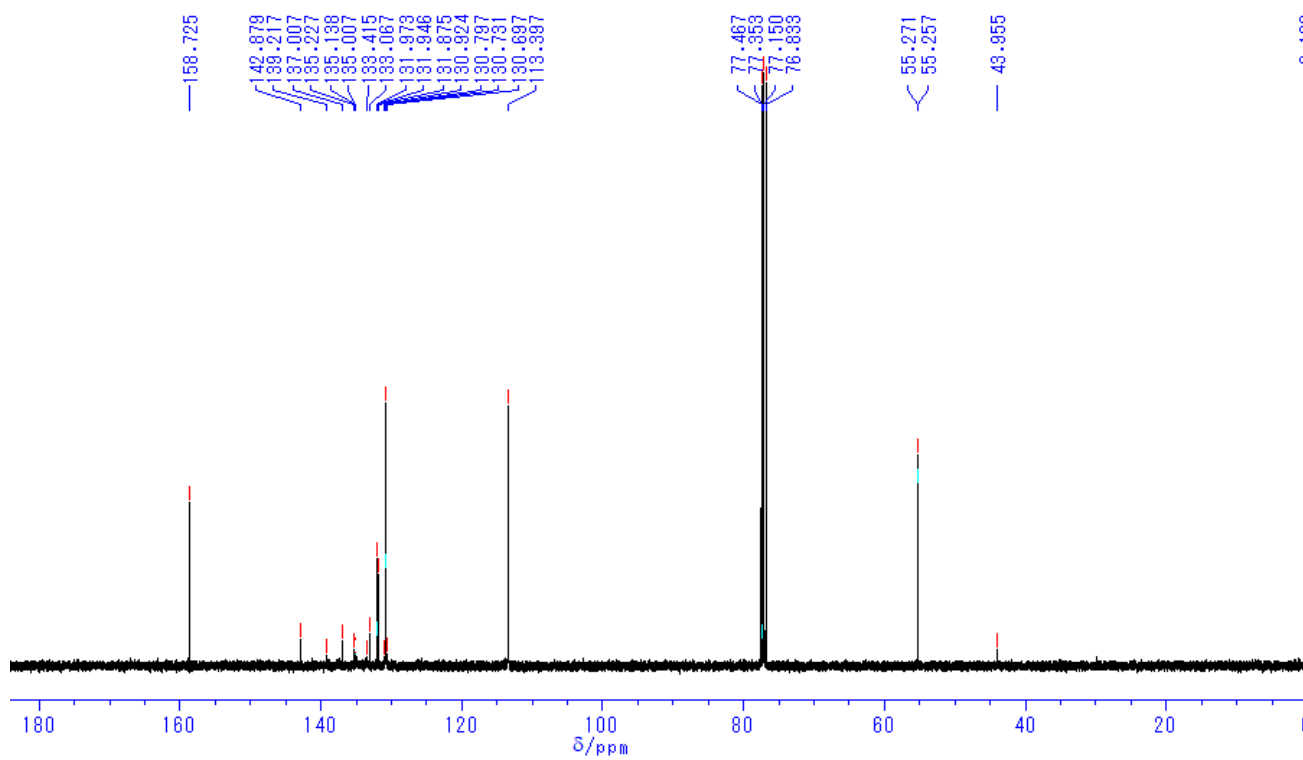

$^1\text{H}$  NMR (400 MHz,  $\text{CDCl}_3$ ) spectrum of  $\alpha\text{H}-(\text{MeOPh})_3\text{-F}_2\text{PyBTM}$  (**3H**)

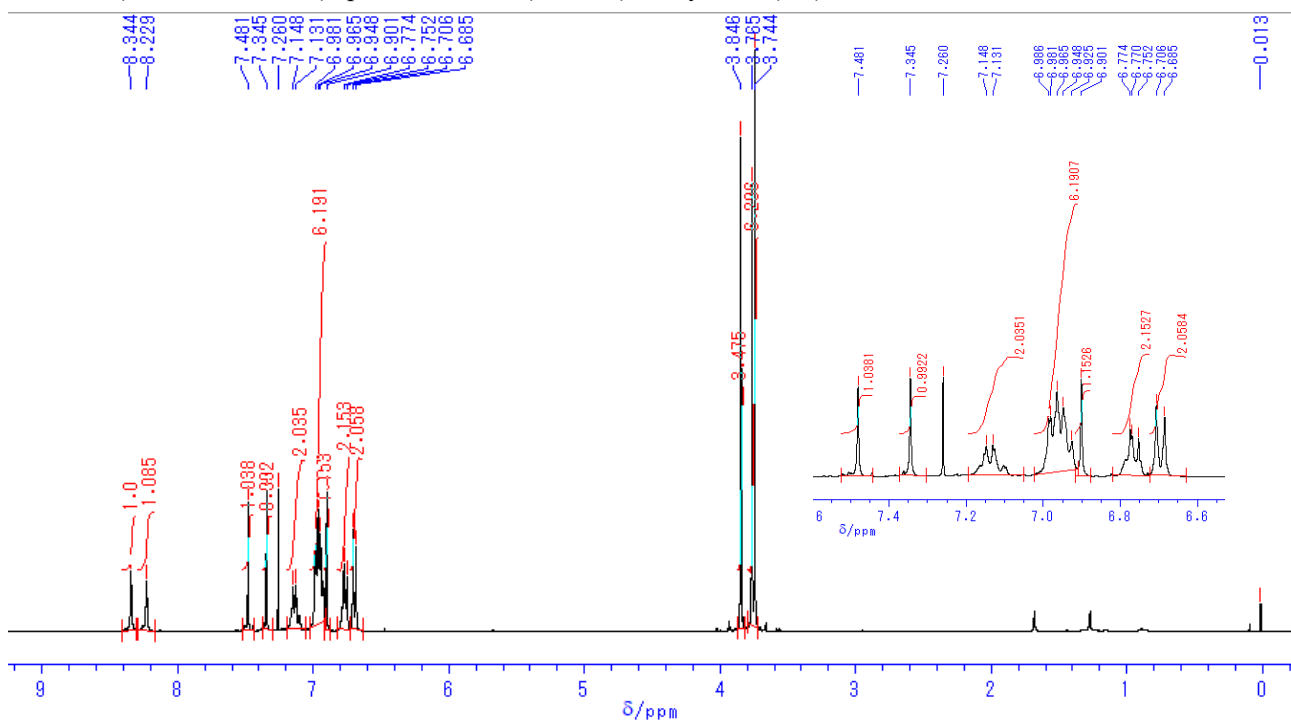

$^{13}\text{C}$  NMR (100 MHz,  $\text{CDCl}_3$ ) spectrum of  $\alpha\text{H}-(\text{MeOPh})_3\text{-F}_2\text{PyBTM}$  (**3H**)

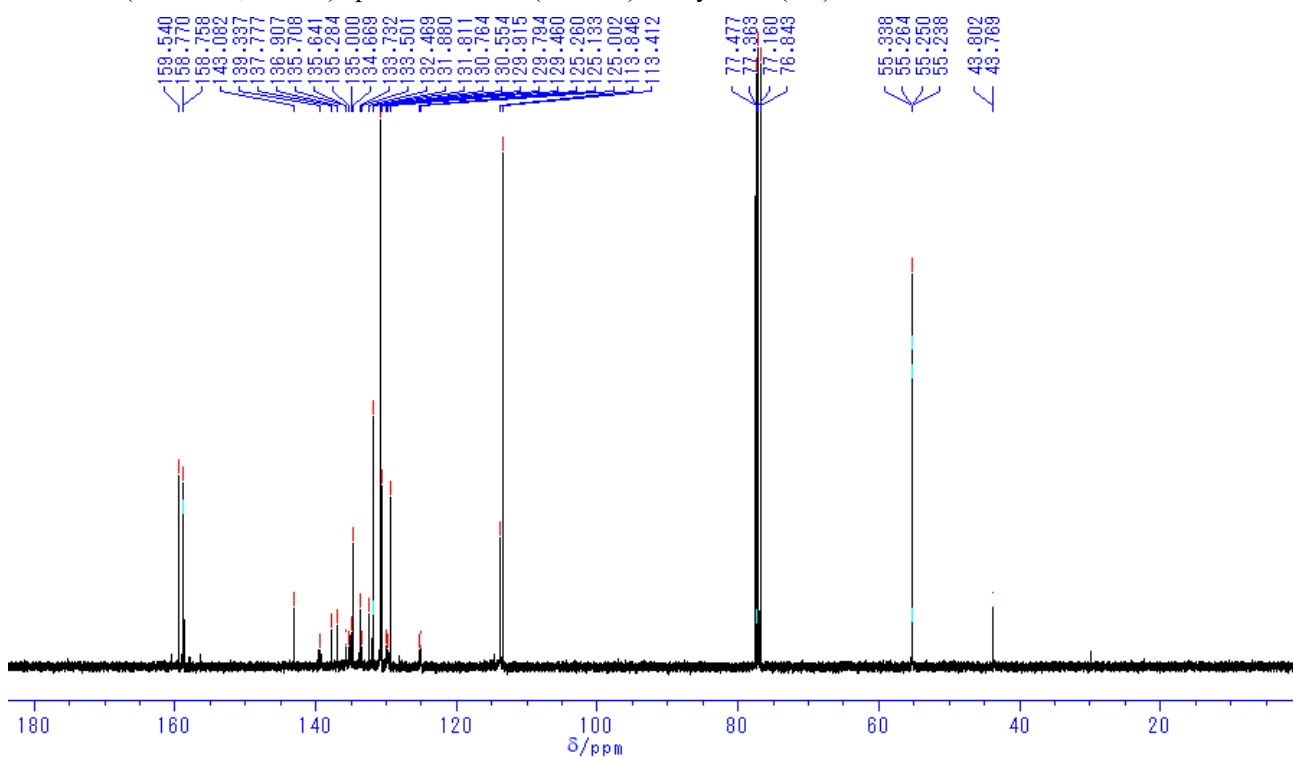

Supplement: d2tc03132a1.pdf [file d2tc03132a1.pdf]
